# Supplementary material for: Bacterial Volatiles (mVOC) Emitted by the Phytopathogen Erwinia amylovora Promote Arabidopsis thaliana Growth and Oxidative Stress
Source: MDPI journal article supplement (doi:10.3390/antiox12030600), 2023-02-28

## Supplementary Figure S2 GC-MS Spectra data

### dichloromethyl propyl sulfone

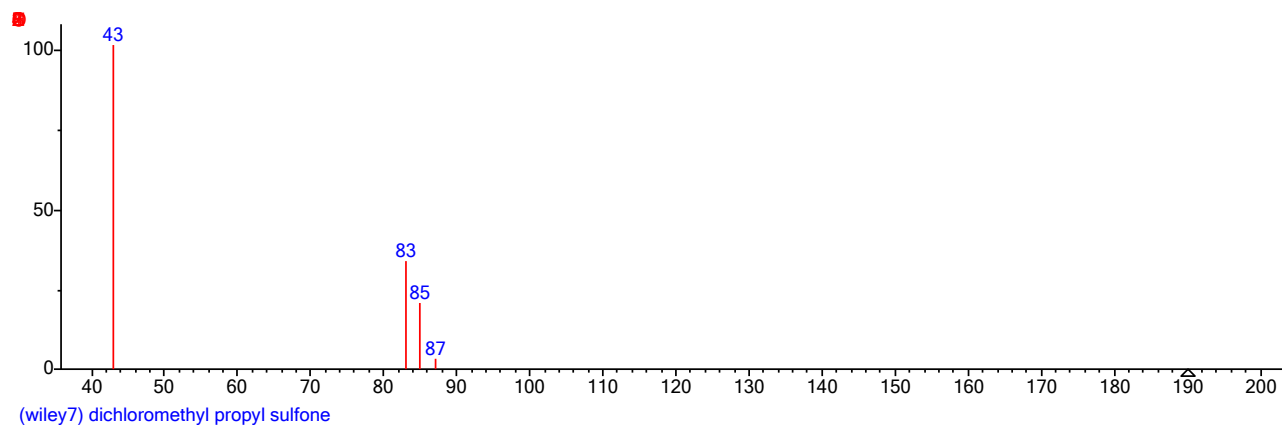

### 2-Ethyl-1-decanol

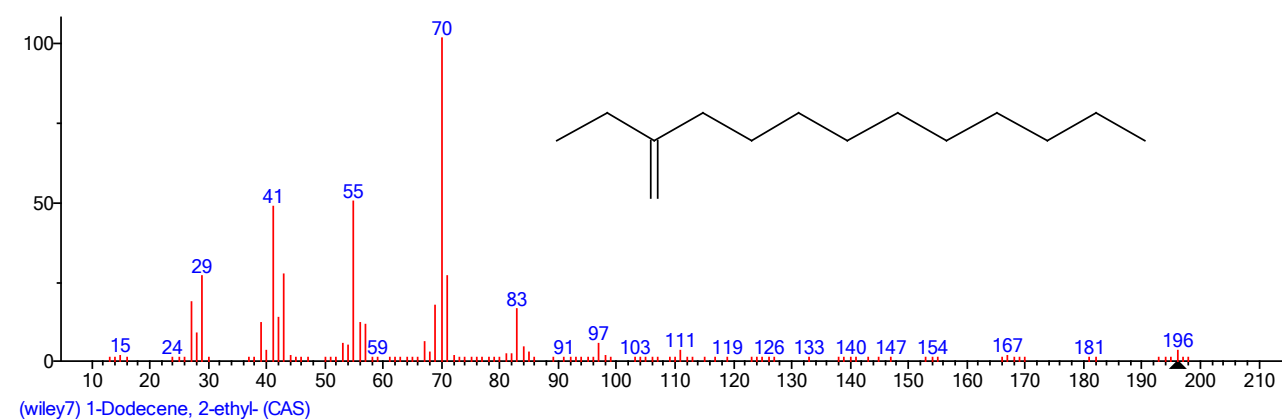

### 1,8-Cineole

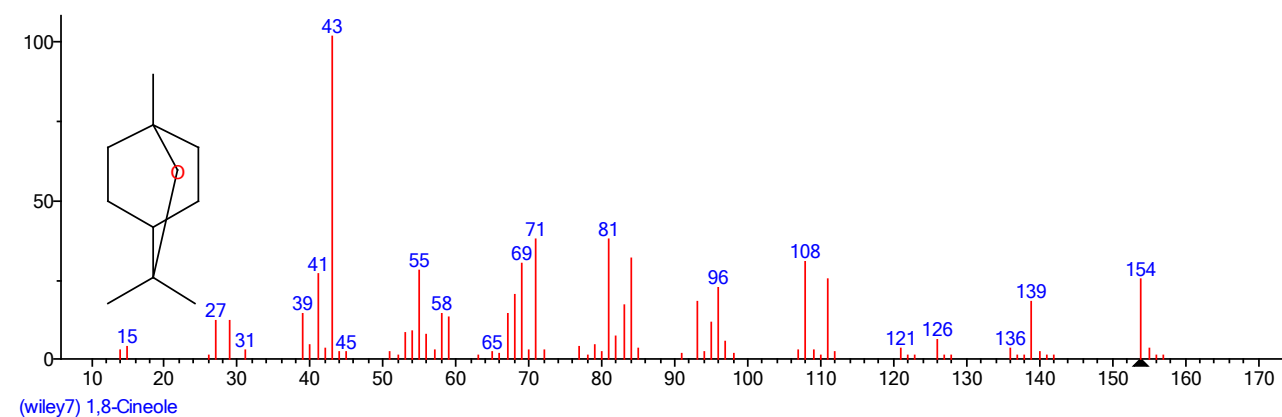

iso amyl alcohol

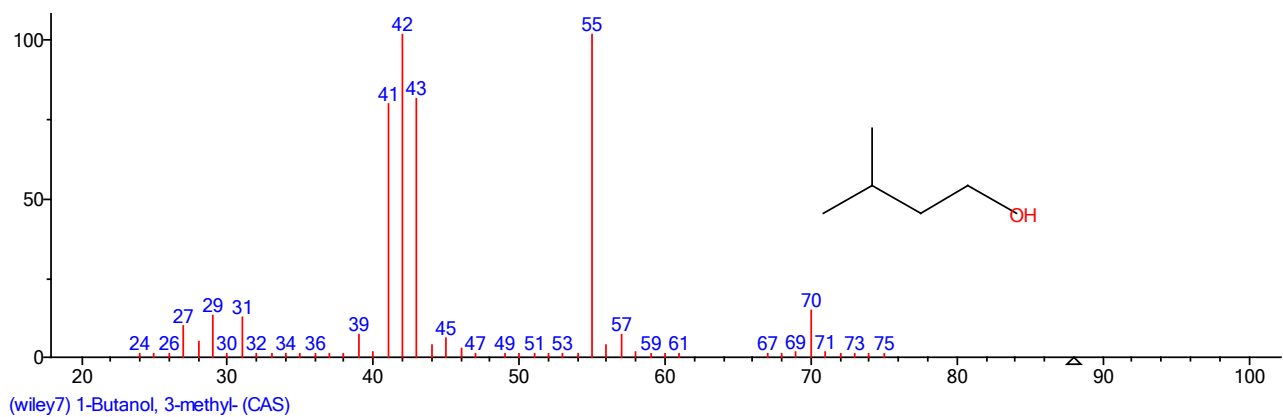

6-Methyl-2-heptanone

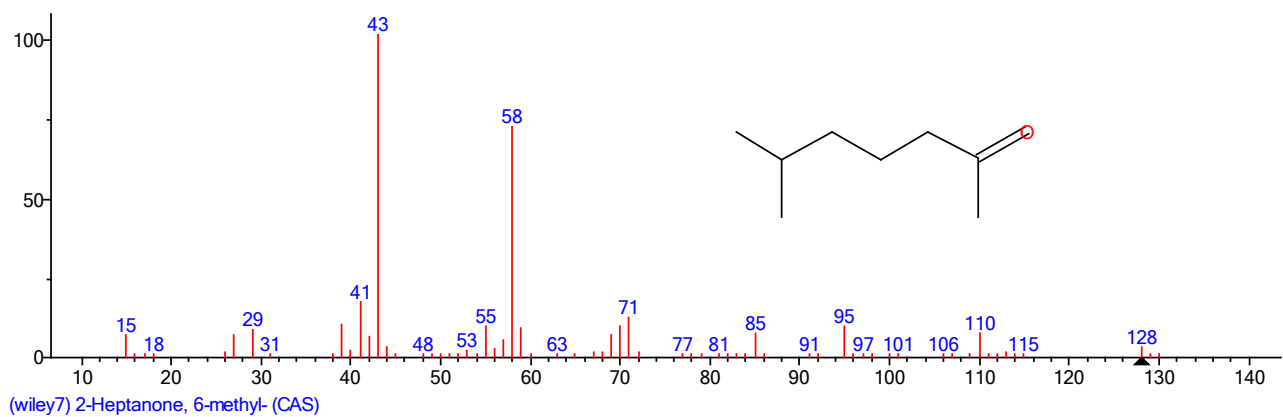

Styrene

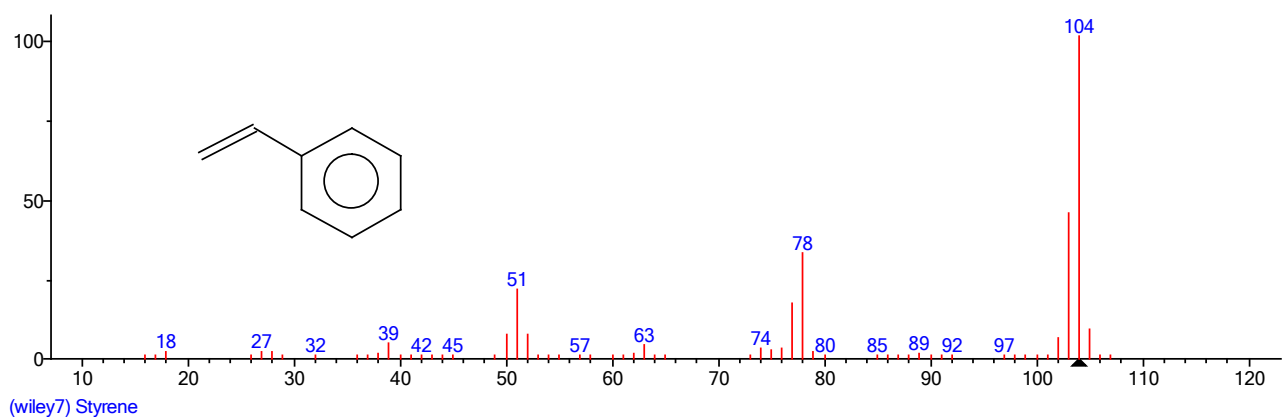

# Octanal

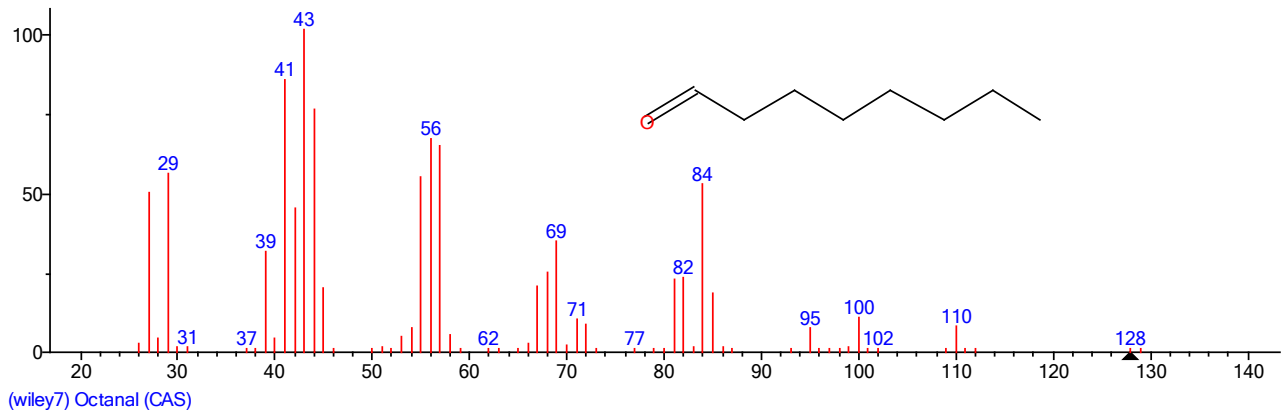

# Tridecane

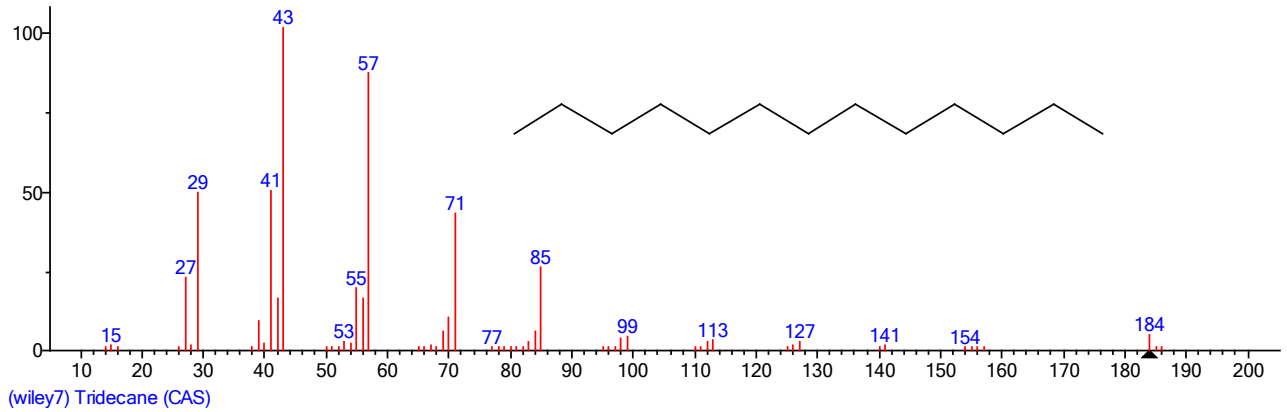

# Tetraisobutylene

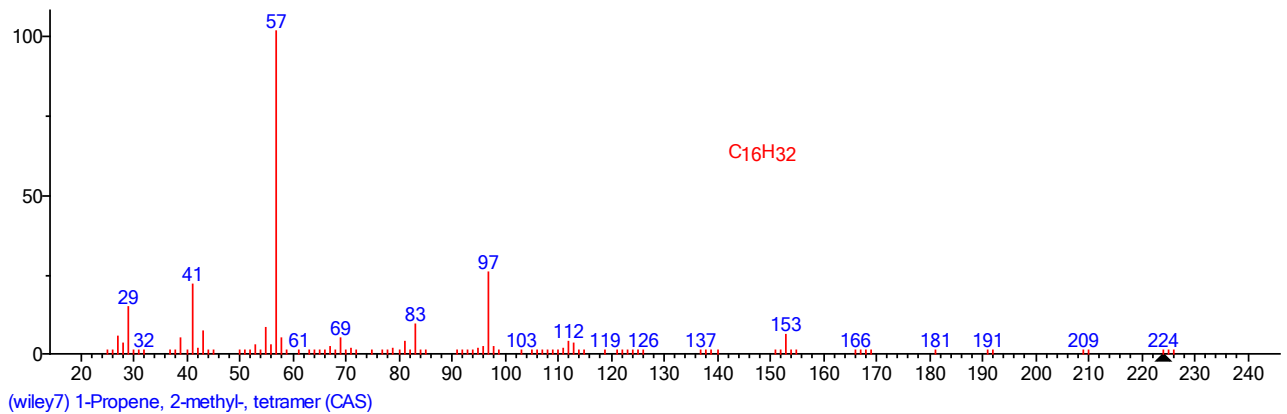

### 4-Octen-3-one

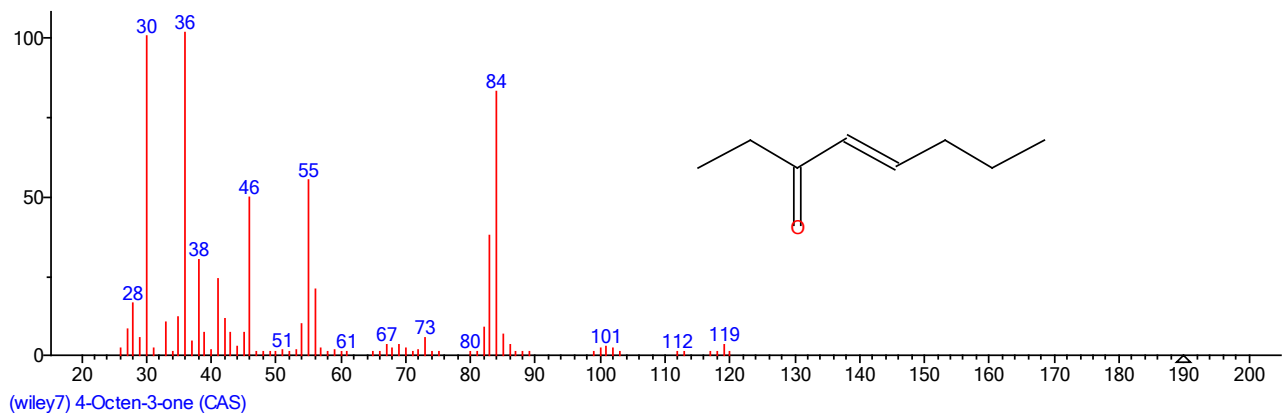

### Nonanal

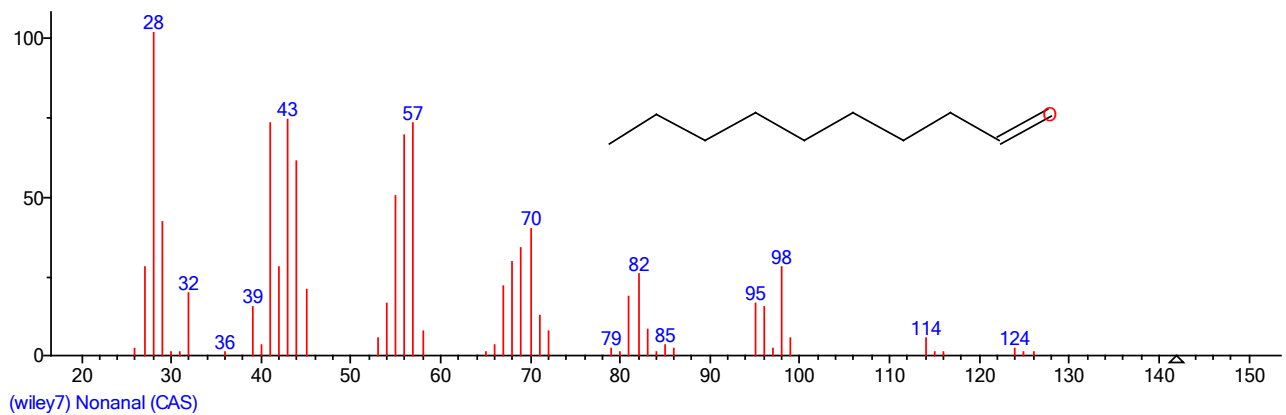

### Tetradecane

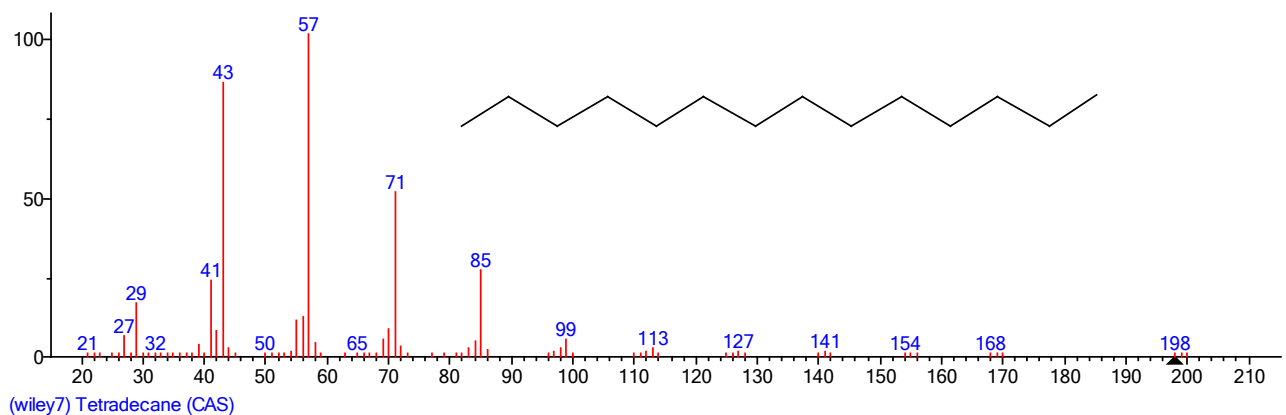

**(E)-2-Octenal**

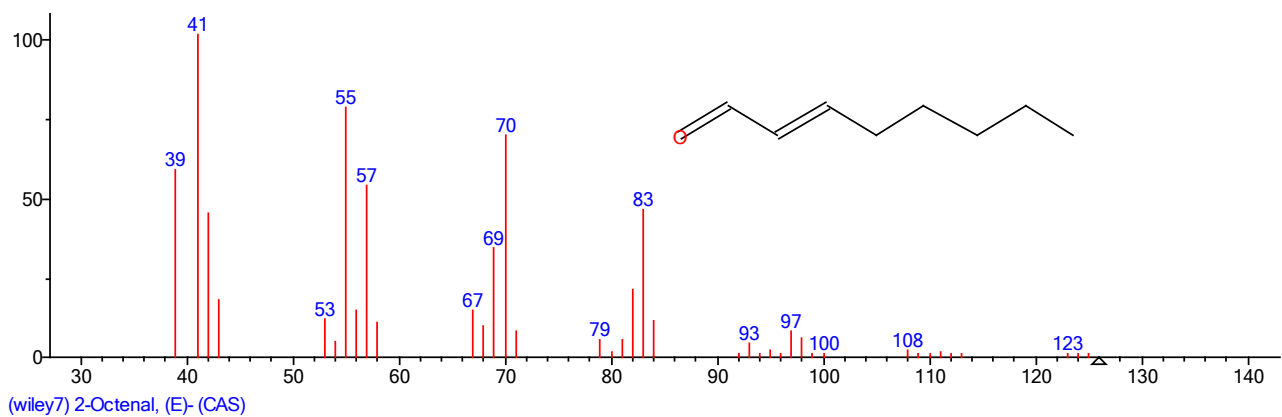

**1-Tetradecene**

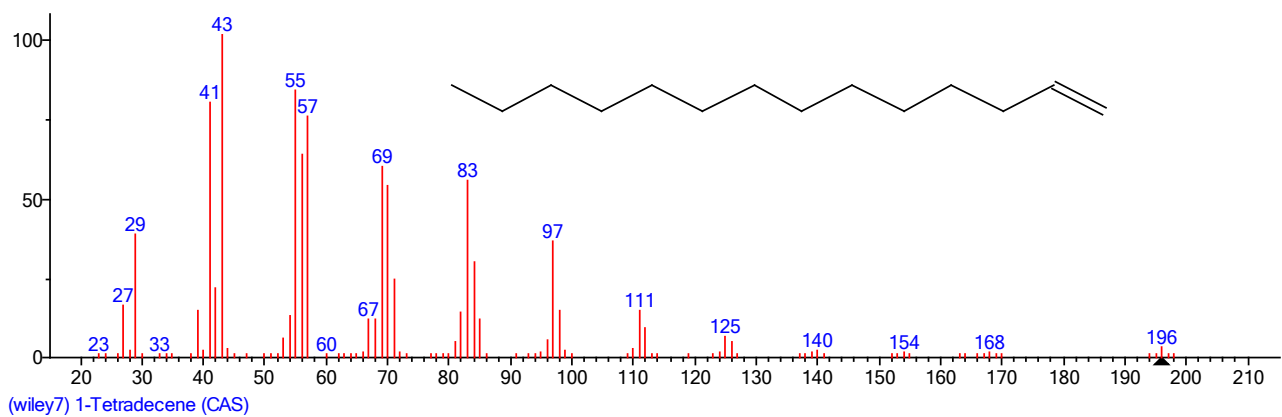

**Undecanal**

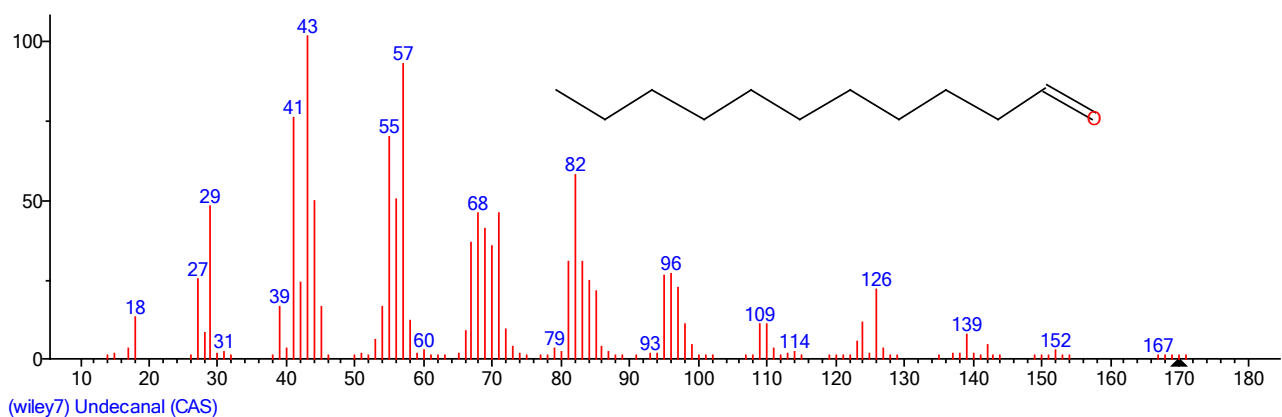

**Pentadecane**

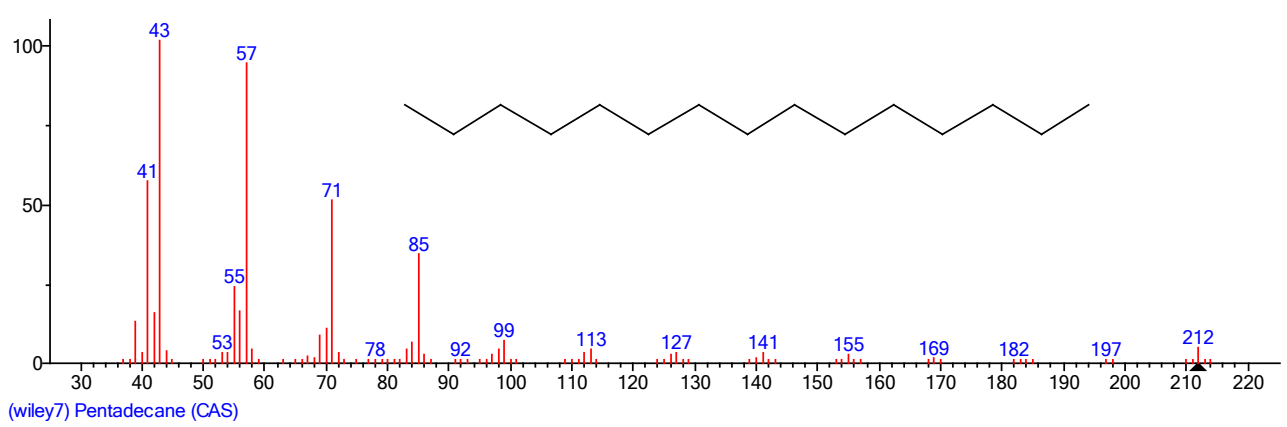

**Benzaldehyde**

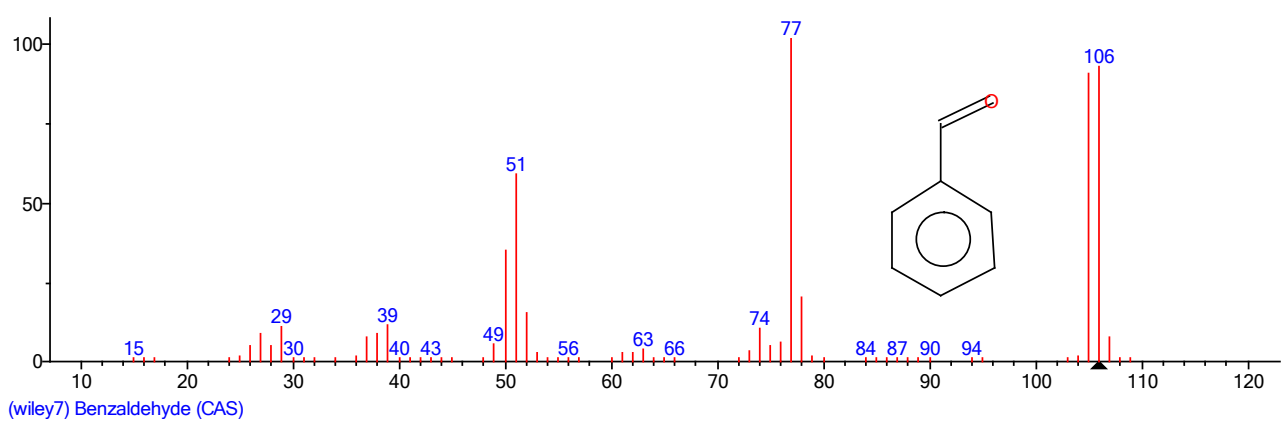

**E-2-dodecenal**

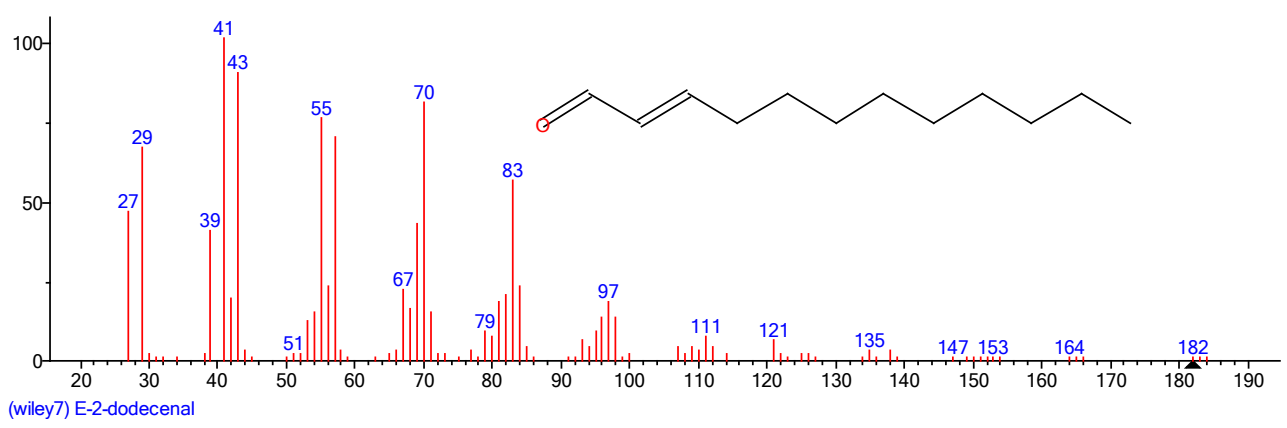

# Tetradecanal

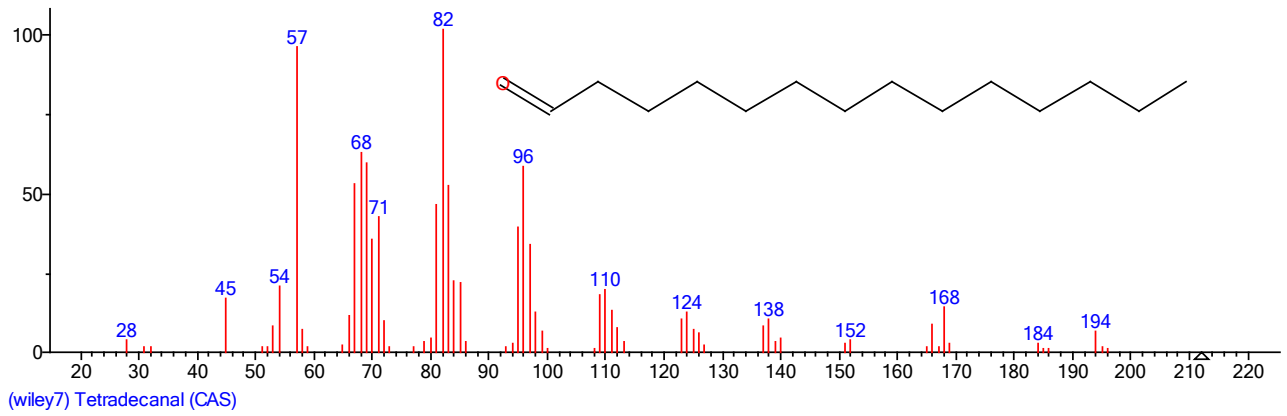

# trans-2-Decenal

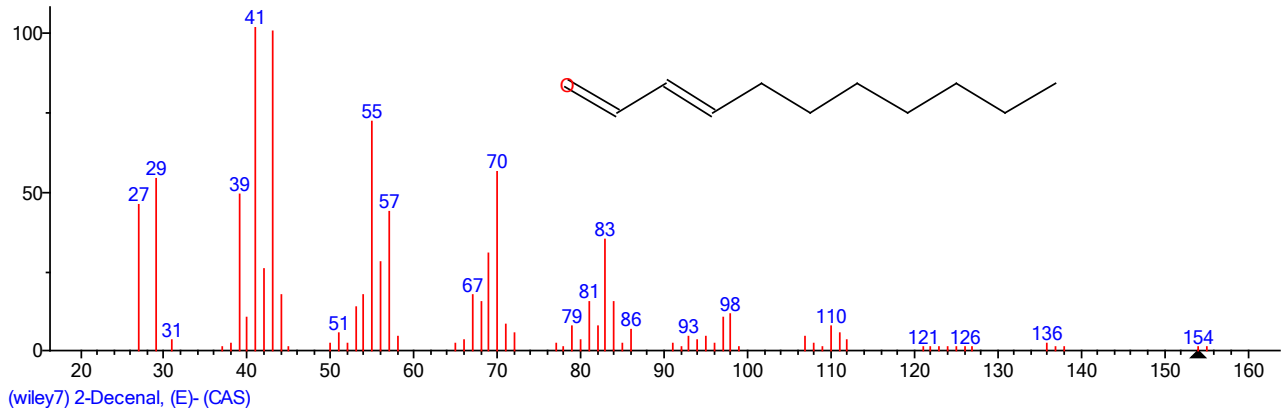

# 1-Nonanol

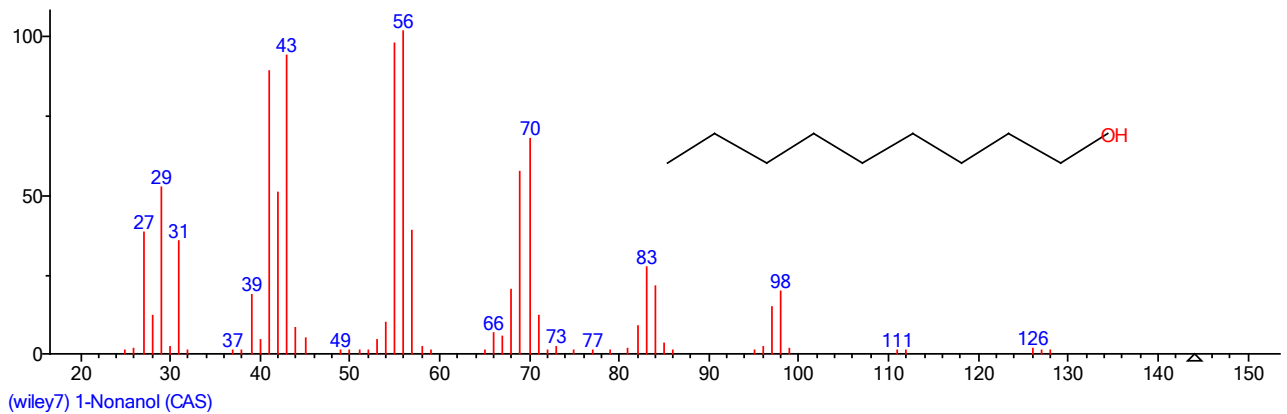

**6,10-Dimethyl-2-undecanone**

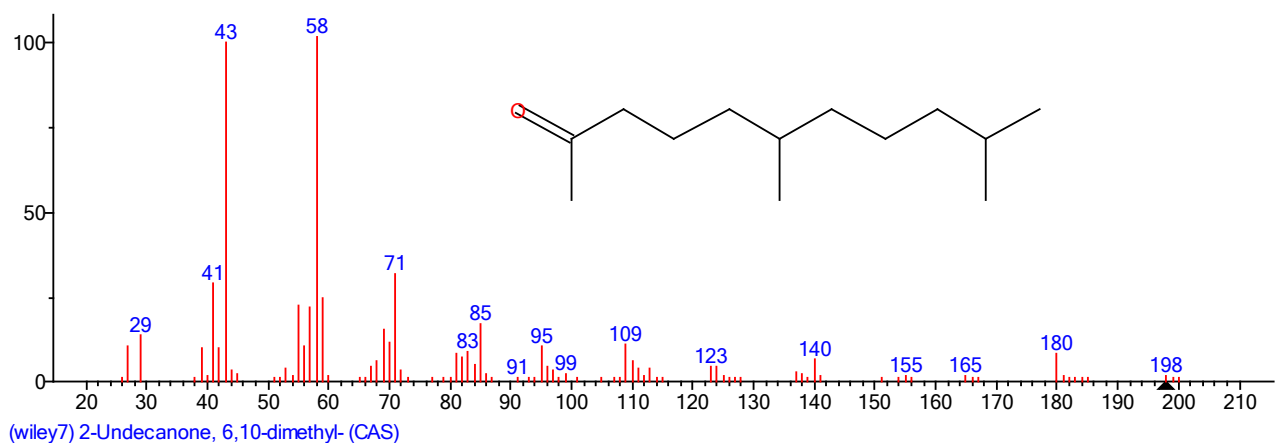

**Heptadecane**

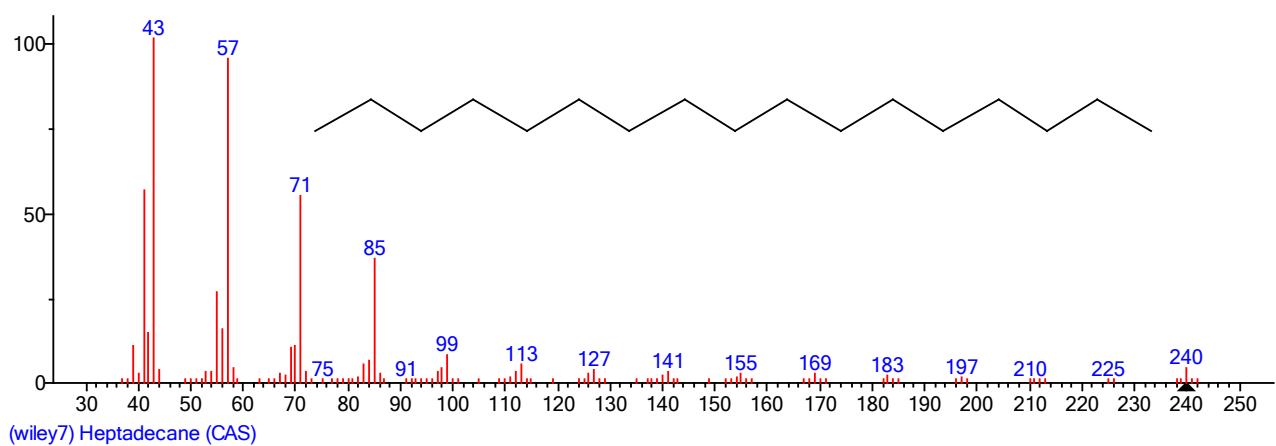

**Methylcyclodecane**

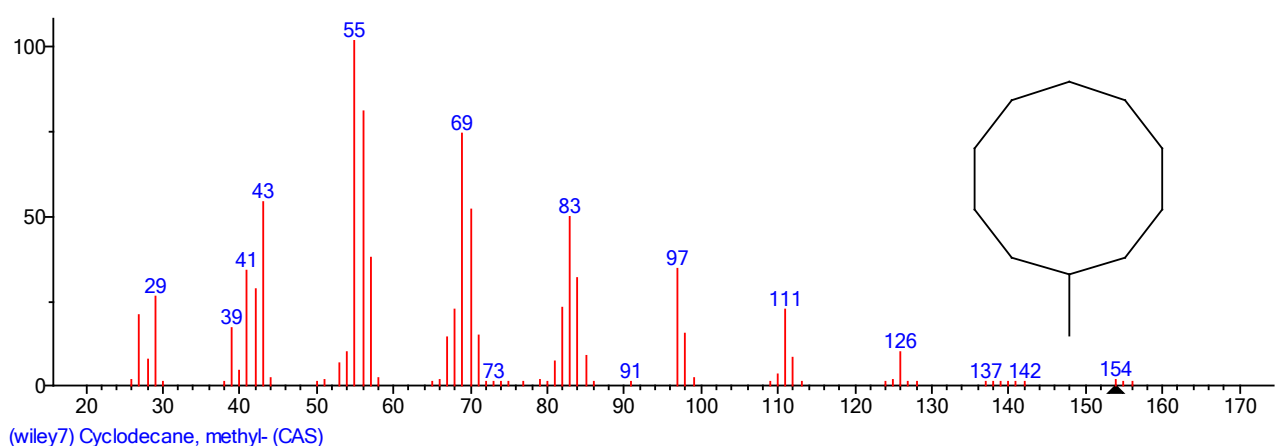



# Tridecanal

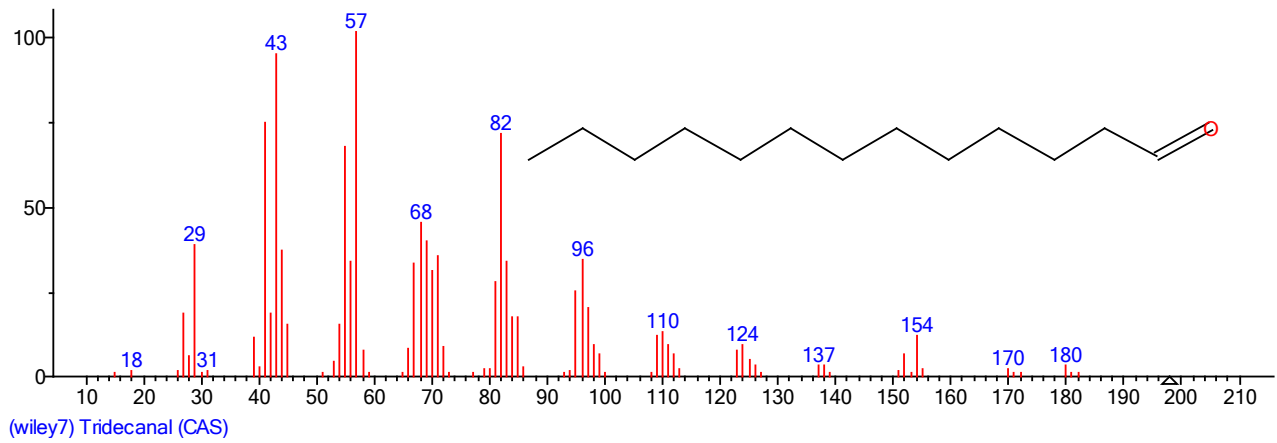

# trans-2-Decenol

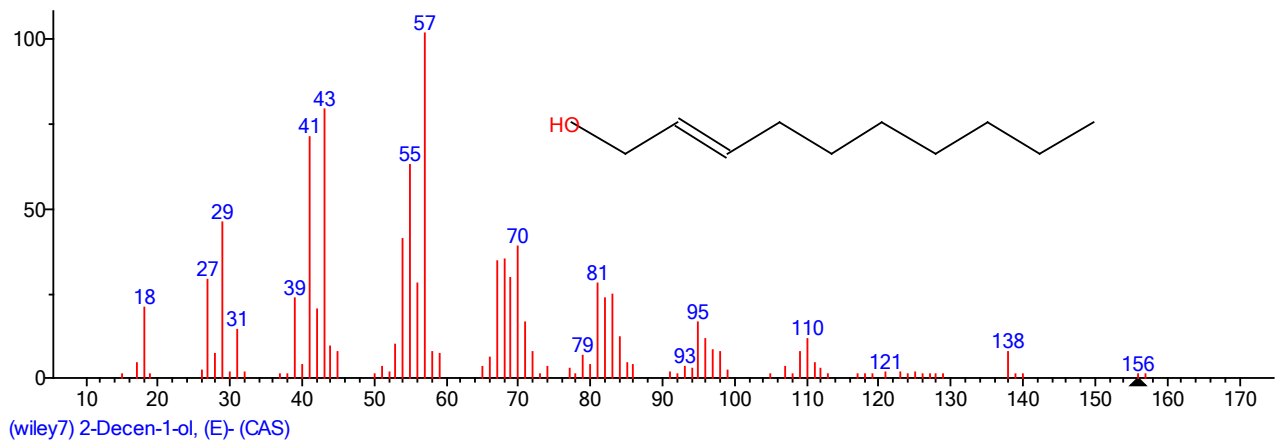

# 1-Undecanol

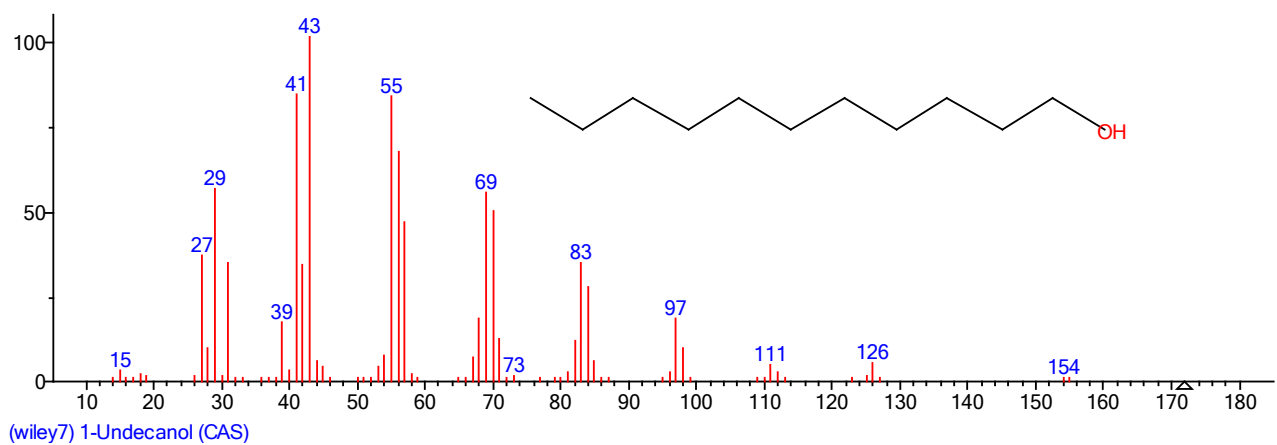

# 1-Dodecanol

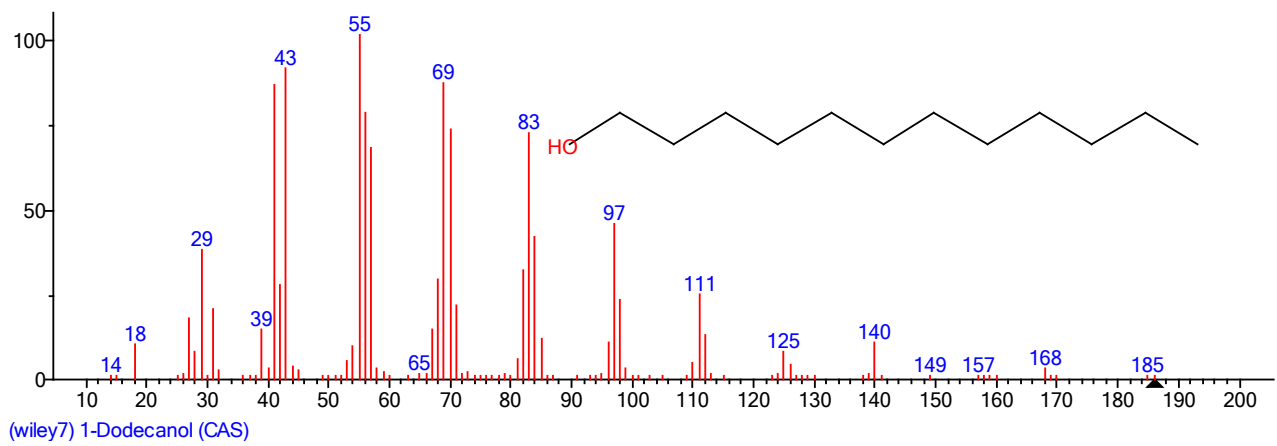

# 1-Tetradecanol

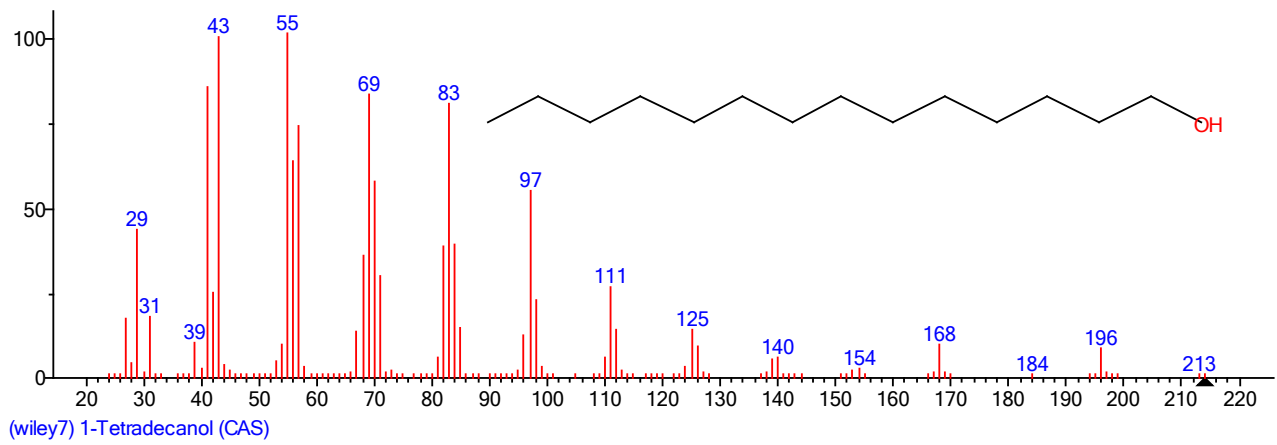

# 2-Pentadecanone

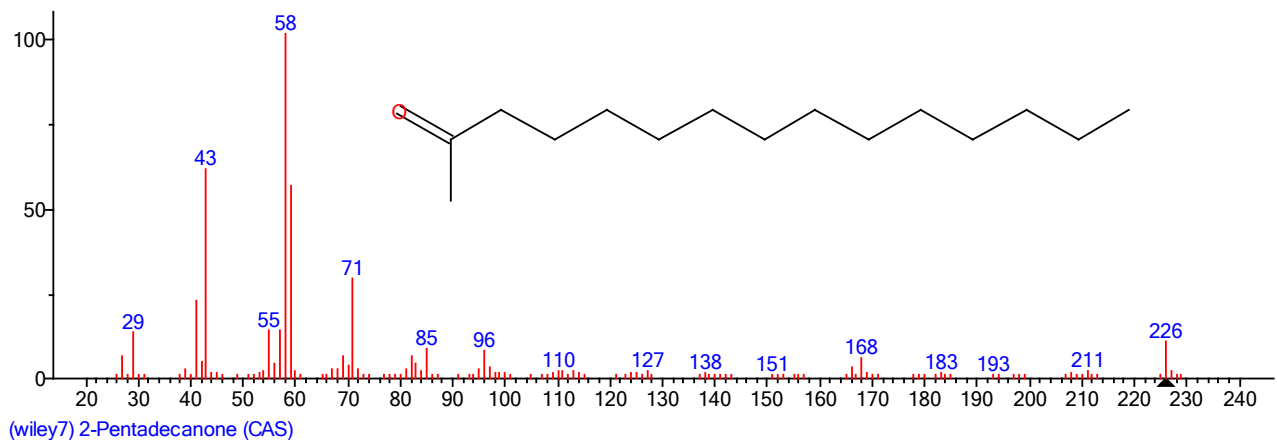

# Pentadecanal

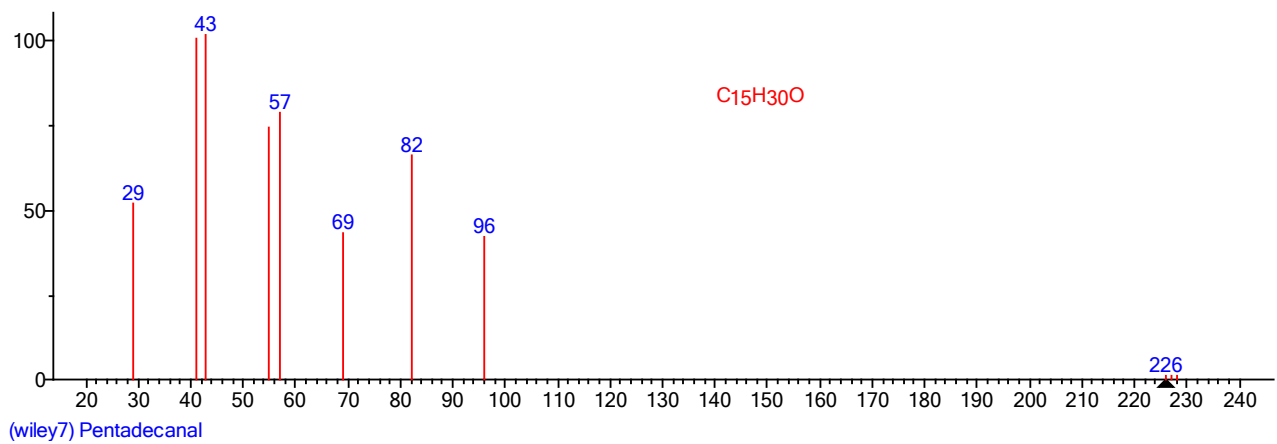

# 6,10,14-Trimethyl-2-pentadecanone

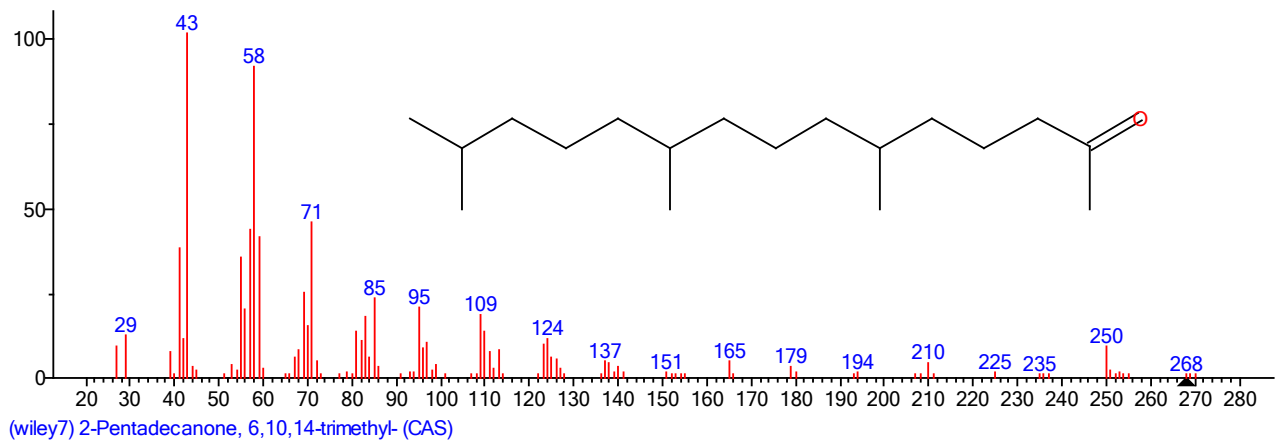

# 1-octanol

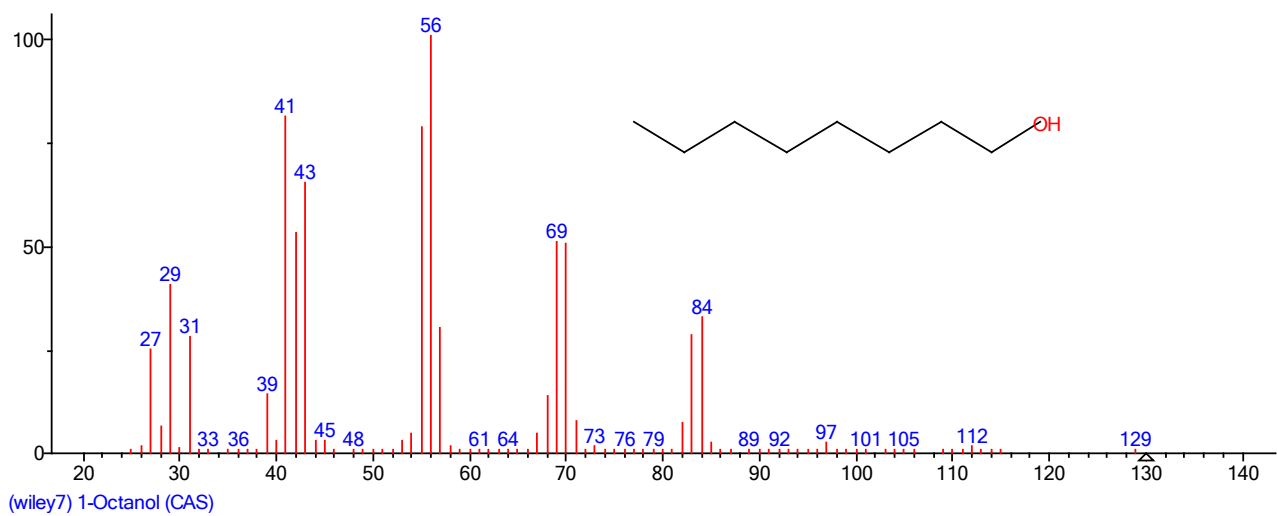

Supplement: s1 [file s1]
