# Supplementary material for: Bacterial Volatiles (mVOC) Emitted by the Phytopathogen Erwinia amylovora Promote Arabidopsis thaliana Growth and Oxidative Stress
Source: MDPI journal article supplement (doi:10.3390/antiox12030600), 2023-02-28
Supplement: s1 [file s1]

## Supplementary Figure S4

Validation of microarray data was done by selecting three of the most downregulated genes (SESA1, SESA2 and SESA3) which were evaluated in a time-course experiment. Supplementary Figure S3 shows the expression of the three genes from 3 h to 16 h of exposure to *E. amylovora* MVOCs. A hormetic trend was found for all genes with peaks of expression at 9 and 12 hr (Figure 8)

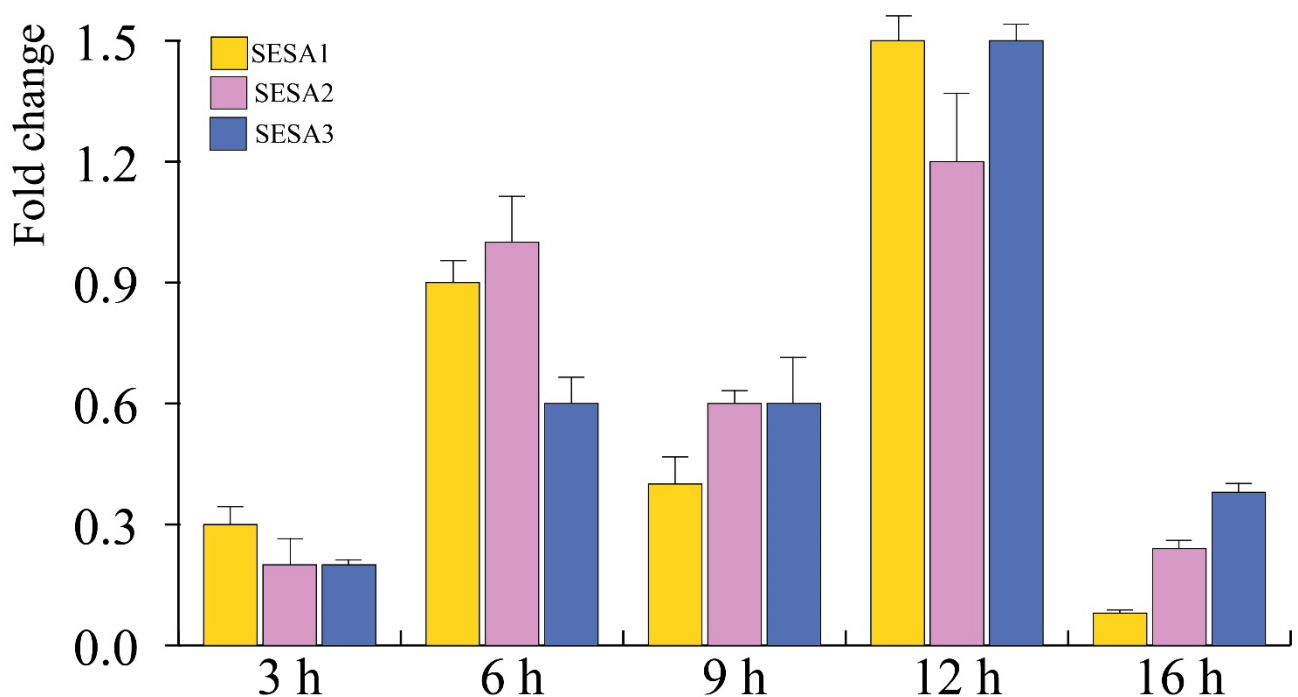

Time course gene expression of *A. thaliana* SESA1, SESA2 and SESA3 genes after exposure of plants to *E. amylovora* MVOCs. Data are expressed as fold change with respect to unexposed plants. Metric bars indicate standard deviation.
