# Supplementary material for: Bacterial Volatiles (mVOC) Emitted by the Phytopathogen Erwinia amylovora Promote Arabidopsis thaliana Growth and Oxidative Stress
Source: MDPI journal article supplement (doi:10.3390/antiox12030600), 2023-02-28
Supplement: s1 [file s1]

## Supplementary Figure S5

### DR5::GUS staining

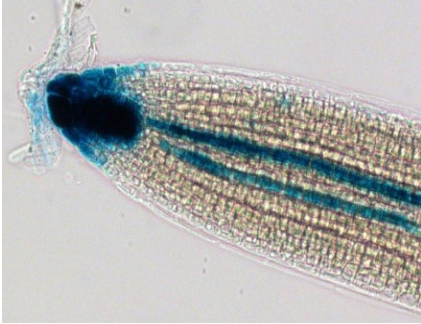

CONTROL

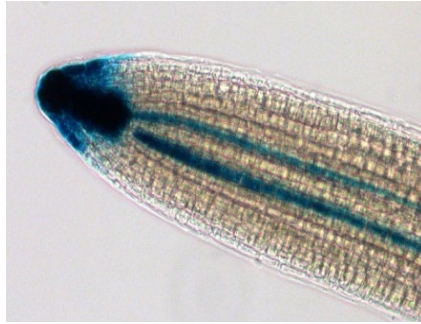

mVOC exposed plants

### GFP localization

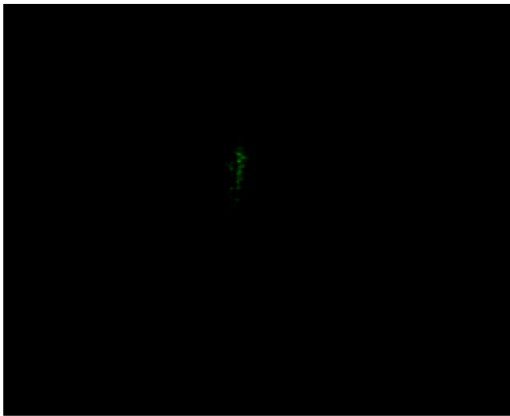

PIN1:GFP CONTROL

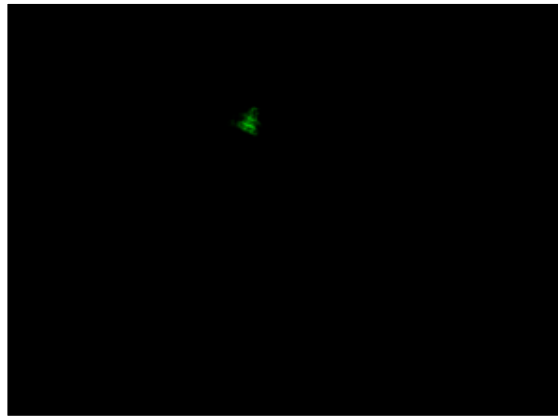

PIN3:GFP CONTROL
