# Supplementary material for: Bacterial Volatiles (mVOC) Emitted by the Phytopathogen Erwinia amylovora Promote Arabidopsis thaliana Growth and Oxidative Stress
Source: MDPI journal article supplement (doi:10.3390/antiox12030600), 2023-02-28

## Supplementary Figure S7

Density plots of secondary root production in controls and in *A. thaliana* seedlings exposed to the two synthetic mVOCs. Bars represent the median difference between the number of secondary roots after 72 h with respect to the time 0. X axis indicates the number of secondary roots, Y axis the total counts.

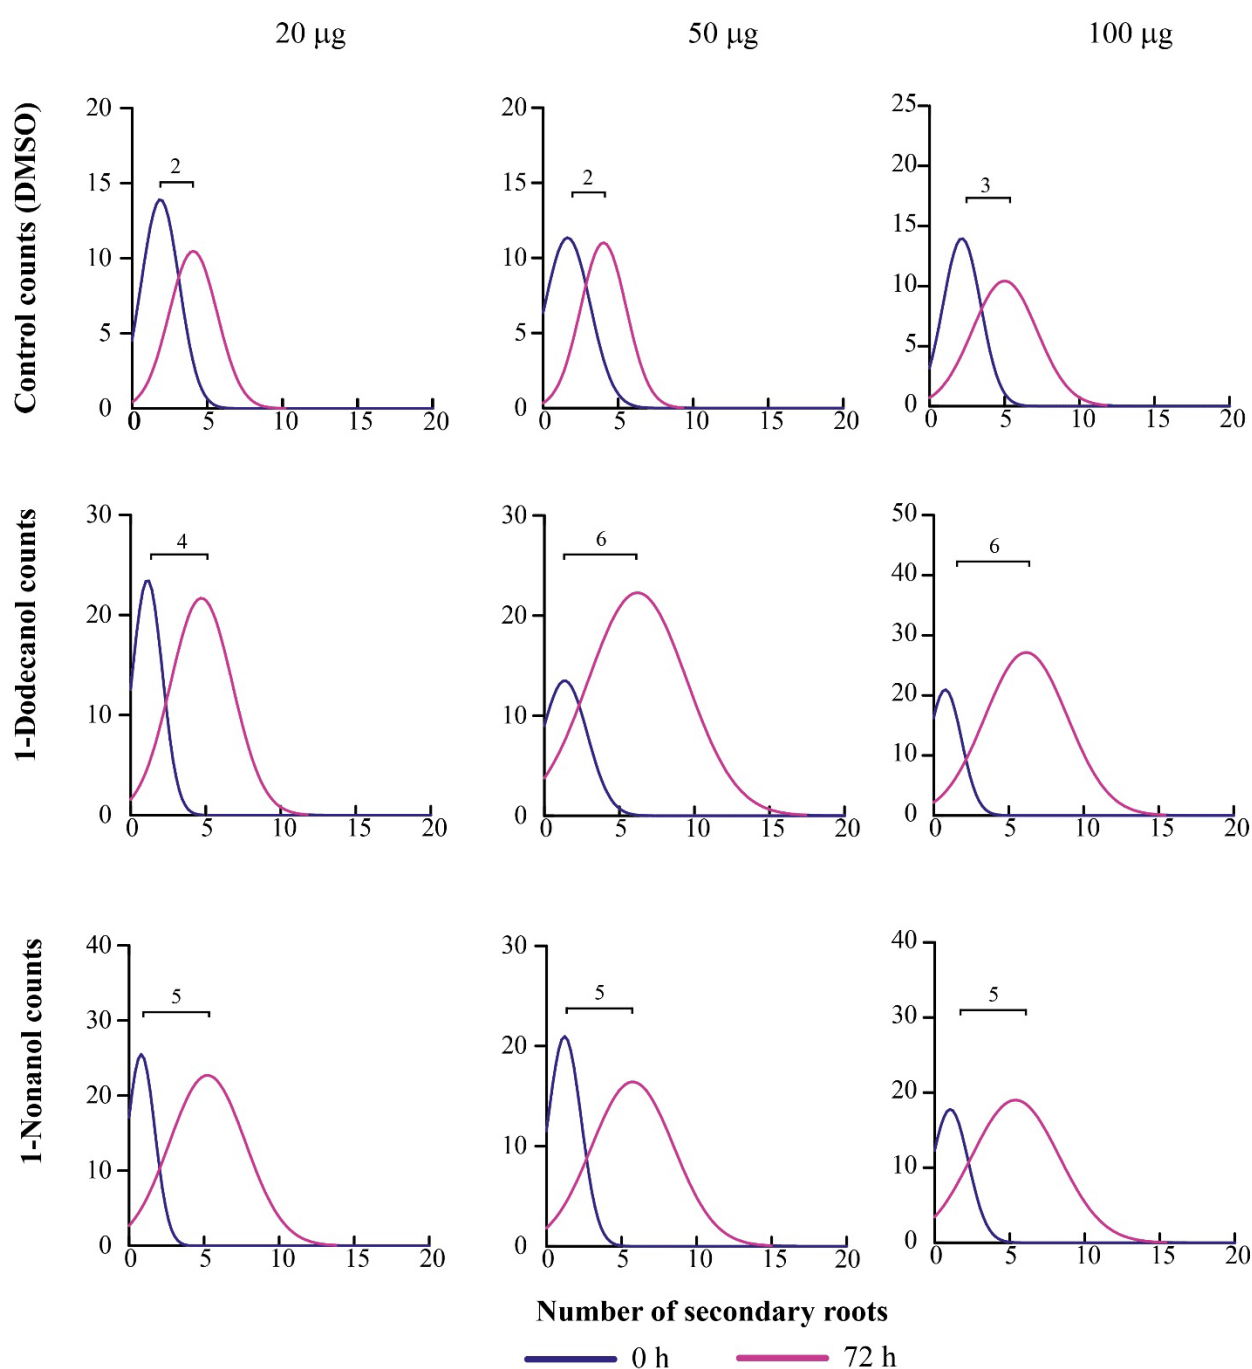

Supplement: s1 [file s1]
