# Supplementary material for: Bacterial Volatiles (mVOC) Emitted by the Phytopathogen Erwinia amylovora Promote Arabidopsis thaliana Growth and Oxidative Stress
Source: MDPI journal article supplement (doi:10.3390/antiox12030600), 2023-02-28
Supplement: s1 [file s1]

**Supplementary Table S1:** List of primers used in this work.

| Gene               | Locus            | Sequence 5'→3'         |         |
|--------------------|------------------|------------------------|---------|
| <i>ACT1</i>        | <i>AT2G37620</i> | TGCACTTCCACATGCTATCC   | Forward |
| <i>ACT1</i>        | <i>AT2G37620</i> | GAGCTGGTTTTGGCTGTCTC   | Reverse |
| <i>eEF1Balpha2</i> | <i>AT5G19510</i> | ACTTGTACCAGTTGGTTATGGG | Forward |
| <i>eEF1Balpha2</i> | <i>AT5G19510</i> | CTGGATGTACTCGTTGTTAGGC | Reverse |
| <i>SESA1</i>       | <i>AT4G27140</i> | CATAGGCCCAAAAATGAGGA   | Forward |
| <i>SESA1</i>       | <i>AT4G27140</i> | GCTGTCCCTGGAGTCTAACG   | Reverse |
| <i>SESA2</i>       | <i>AT4G27150</i> | TGTCGAGTTCGACGAAGATG   | Forward |
| <i>SESA2</i>       | <i>AT4G27150</i> | GGCAAACACAAACTGGCTCT   | Reverse |
| <i>SESA3</i>       | <i>AT4G27160</i> | TGGATGAGCAAGCAAATGAG   | Forward |
| <i>SESA3</i>       | <i>AT4G27160</i> | AGGGACATTCACCAACTTGC   | Reverse |
| <i>PIN1</i>        | <i>AT1G73590</i> | ACAAAACGACGCAGGCTAAG   | Forward |
| <i>PIN1</i>        | <i>AT1G73590</i> | AGGAAATGAGGGACCAGGTG   | Reverse |
| <i>PIN3</i>        | <i>AT1G70940</i> | GCGCTACAATCCAAGACAGG   | Forward |
| <i>PIN3</i>        | <i>AT1G70940</i> | GCGACGAGAGCCCAAATAAG   | Reverse |
| <i>CAT1</i>        | <i>AT1G20630</i> | CAGGACTACAGGCACATGGA   | Forward |
| <i>CAT1</i>        | <i>AT1G20630</i> | CGACAGGCATTTGATCCAC    | Reverse |
| <i>SOD1</i>        | <i>AT1G08830</i> | TGCCACCTTCACAATCACTG   | Forward |
| <i>SOD1</i>        | <i>AT1G08830</i> | TGAGTTCATGGCCTCCCTTT   | Reverse |
| <i>PER4</i>        | <i>AT1G14540</i> | GGCTAGCCTCAACGATCTCT   | Forward |
| <i>PER4</i>        | <i>AT1G14540</i> | GCGTCAATGTCACTCGAGTT   | Reverse |
| <i>APX1</i>        | <i>AT1G07890</i> | GGGTCGTCTTCCTGATGCTA   | Forward |
| <i>APX1</i>        | <i>AT1G07890</i> | GGGTCGTCTTCCTGATGCTA   | Reverse |
| <i>RBOHH</i>       | <i>AT5G60010</i> | TTAGTGGTGGAGGAGGCAAG   | Forward |
| <i>RBOHH</i>       | <i>AT5G60010</i> | TGCATCTCCAGCTTCGTACA   | Reverse |
