# Supplementary material for: Bacterial Volatiles (mVOC) Emitted by the Phytopathogen Erwinia amylovora Promote Arabidopsis thaliana Growth and Oxidative Stress
Source: MDPI journal article supplement (doi:10.3390/antiox12030600), 2023-02-28
Supplement: s1 [file s1]

**Supplementary Table S2. Differentially expressed genes in seedlings of *A. thaliana* exposed to *E. amylovora* mVOCs. Values are expressed as fold change with re-spect to unexposed plants.**

| Locus tag                | Gene symbol      | Fold change | Gene description                                                                          | Gene Ontology                                        |                                      |                                  |
|--------------------------|------------------|-------------|-------------------------------------------------------------------------------------------|------------------------------------------------------|--------------------------------------|----------------------------------|
|                          |                  |             |                                                                                           | Molecular function                                   | Biological process                   | Cellular component               |
| <b>UPREGULATED GENES</b> |                  |             |                                                                                           |                                                      |                                      |                                  |
| <i>AT1G03103</i>         | <i>AT1G03103</i> | 2.05        | bifunctional inhibitor/lipid-transfer protein/seed storage 2S albumin superfamily protein |                                                      |                                      | extracellular region             |
| <i>AT1G06340</i>         | <i>AT1G06340</i> | 3.80        | plant Tudor-like protein                                                                  |                                                      |                                      |                                  |
| <i>AT1G07645</i>         | <i>DSI-1VOC</i>  | 2.04        | desiccation-induced 1VOC-like protein                                                     |                                                      |                                      | extracellular region             |
| <i>AT1G09860</i>         | <i>PUP16</i>     | 2.27        | purine permease 16                                                                        | purine nucleobase transmembrane transporter activity | purine nucleobase transport          | membrane                         |
| <i>AT1G09935</i>         | <i>AT1G09935</i> | 2.45        | Phosphoglycerate mutase family protein                                                    | catalytic activity                                   | biological process                   |                                  |
| <i>AT1G09950</i>         | <i>RAS1</i>      | 2.94        | response to ABA and salt 1                                                                |                                                      |                                      |                                  |
| <i>AT1G12805</i>         | <i>AT1G12805</i> | 2.49        | nucleotide binding protein                                                                |                                                      |                                      | mitochondrion                    |
| <i>AT1G14880</i>         | <i>PCR1</i>      | 2.47        | cadmium resistance protein 1                                                              | mRNA binding                                         | defense response to bacterium        | cytoplasm                        |
| <i>AT1G15520</i>         | <i>ABCG40</i>    | 2.57        | pleiotropic drug resistance 12                                                            | efflux transmembrane transporter activity            | abscisic acid transport              | mitochondrion                    |
| <i>AT1G21990</i>         | <i>AT1G21990</i> | 4.93        | F-box/RNI-like/FBD-like domains-containing protein                                        |                                                      |                                      |                                  |
| <i>AT1G27461</i>         | <i>AT1G27461</i> | 2.88        | uncharacterized protein                                                                   | core promoter sequence-specific DNA binding          | seed dormancy process                | cytosol                          |
| <i>AT1G28260</i>         | <i>AT1G28260</i> | 2.10        | Telomerase activating protein Est1                                                        |                                                      |                                      |                                  |
| <i>AT1G30950</i>         | <i>UFO</i>       | 2.41        | UNUSUAL FLORAL ORGANS F-box family protein                                                | transcription factor binding                         | SCF-dependent proteasomal ubiquitin- | part of ubiquitin ligase complex |



| Locus tag        | Gene symbol      | Fold change | Gene description                                                                                          | Gene Ontology                                        |                                          |                      |
|------------------|------------------|-------------|-----------------------------------------------------------------------------------------------------------|------------------------------------------------------|------------------------------------------|----------------------|
|                  |                  |             |                                                                                                           | Molecular function                                   | Biological process                       | Cellular component   |
|                  |                  |             |                                                                                                           |                                                      | dependent protein catabolic process      |                      |
| <i>AT1G50060</i> | <i>AT1G50060</i> | 2.80        | CAP (Cysteine-rich secretory proteins, Antigen 5, and Pathogenesis-related 1 protein) superfamily protein |                                                      |                                          | extracellular region |
| <i>AT1G54020</i> | <i>AT1G54020</i> | 2.60        | GDSL-like Lipase/Acyl hydrolase superfamily protein                                                       |                                                      |                                          |                      |
| <i>AT1G57943</i> | <i>PUP17</i>     | 4.38        | purine permease 17                                                                                        | purine nucleobase transmembrane transporter activity | purine nucleobase transport              | membrane             |
| <i>AT1G60570</i> | <i>AT1G60570</i> | 2.06        | Galactose oxidase/kelch repeat superfamily protein                                                        |                                                      |                                          | cytoplasm            |
| <i>AT1G64130</i> | <i>AT1G64130</i> | 2.23        | polyketide cyclase/dehydrase and lipid transport superfamily protein                                      |                                                      | macromolecule biosynthetic process       |                      |
| <i>AT1G64160</i> | <i>DIR5</i>      | 4.24        | Disease resistance-responsive (dirigent-like protein) family protein                                      | guiding stereospecific synthesis activity            | (-)-pinorexinol biosynthetic process     | extracellular region |
| <i>AT1G65570</i> | <i>AT1G65570</i> | 2.14        | Pectin lyase-like superfamily protein                                                                     | polygalacturonase activity                           | carbohydrate metabolic process           | apoplast             |
| <i>AT1G69818</i> | <i>AT1G69818</i> | 2.05        | defensin-like protein                                                                                     |                                                      |                                          | extracellular region |
| <i>AT1G69920</i> | <i>GSTU12</i>    | 2.08        | glutathione S-transferase TAU 12                                                                          | glutathione transferase activity                     | toxin catabolic process                  | cytoplasm            |
| <i>AT1G72260</i> | <i>THI2.1</i>    | 4.35        | thionin 2.1                                                                                               | toxin activity                                       | jasmonic acid mediated signaling pathway | extracellular region |
| <i>AT1G77655</i> | <i>AT1G77655</i> | 2.55        | uncharacterized protein                                                                                   |                                                      | cellular component assembly              | mitochondrion        |



| Locus tag | Gene symbol | Fold change | Gene description                                            | Gene Ontology                           |                                        |                             |
|-----------|-------------|-------------|-------------------------------------------------------------|-----------------------------------------|----------------------------------------|-----------------------------|
|           |             |             |                                                             | Molecular function                      | Biological process                     | Cellular component          |
| AT1G79800 | ENODL7      | 3.58        | early nodulin-like protein 7                                | electron transfer activity              |                                        | membrane                    |
| AT2G02620 | AT2G02620   | 2.80        | cysteine/histidine-rich C1 domain-containing protein        |                                         |                                        | nucleus                     |
| AT2G03460 | AT2G03460   | 2.97        | Galactose oxidase/kelch repeat superfamily protein          |                                         |                                        |                             |
| AT2G04045 | AT2G04045   | 2.71        | Defensin-like (DEFL) family protein                         |                                         |                                        | extracellular region        |
| AT2G11005 | AT2G11005   | 2.02        | glycine-rich protein                                        |                                         |                                        | nucleus                     |
| AT2G14378 | AT2G14378   | 2.48        | egg cell-secreted-like protein (DUF1278)                    |                                         |                                        |                             |
| AT2G14610 | PR1         | 2.10        | pathogenesis-related protein 1                              |                                         | defense response                       | extracellular region        |
| AT2G19550 | AT2G19550   | 2.30        | alpha/beta-Hydrolases superfamily protein                   |                                         |                                        | membrane                    |
| AT2G22060 | AT2G22060   | 2.62        | galactose oxidase/kelch repeat protein                      |                                         |                                        | mitochondrion               |
| AT2G22460 | AT2G22460   | 2.03        | MIZU-KUSSEI-like protein                                    |                                         | hydrotropism                           | nucleus                     |
| AT2G25685 | SCRL17      | 2.15        | SCR-like protein 17                                         |                                         |                                        |                             |
| AT2G25890 | AT2G25890   | 2.06        | Oleosin-like protein                                        |                                         |                                        | mitochondrion               |
| AT2G26130 | RSL1        | 2.46        | RING/U-box protein with C6HC-type zinc finger               | RNA-DNA hybrid ribonuclease activity    | gibberellin mediated signaling pathway | nucleus                     |
| AT2G26450 | AT2G26450   | 2.06        | Plant invertase/pectin methylesterase inhibitor superfamily |                                         | cell differentiation                   |                             |
| AT2G29470 | GSTU3       | 5.19        | glutathione S-transferase TAU 3                             |                                         | toxin catabolic process                | cytoplasm                   |
| AT2G30770 | CYP71A13    | 4.16        | cytochrome P450, family 71, subfamily A, polypeptide 13     | indoleacetaldoxime dehydratase activity | camalexin biosynthetic process         | endoplasmic reticulum lumen |



| Locus tag | Gene symbol | Fold change | Gene description                                                 | Gene Ontology                                        |                                                 |                      |
|-----------|-------------|-------------|------------------------------------------------------------------|------------------------------------------------------|-------------------------------------------------|----------------------|
|           |             |             |                                                                  | Molecular function                                   | Biological process                              | Cellular component   |
| AT2G32275 | AT2G32275   | 2.07        | uncharacterized protein                                          |                                                      |                                                 | nucleus              |
| AT2G33720 | AT2G33720   | 5.77        | AP2/B3-like transcriptional factor family protein                | DNA-binding transcription factor activity            | response to lipid                               | nucleus              |
| AT2G34090 | MEE18       | 2.02        | maternal effect embryo arrest 18 protein                         | LPPG:FO 2-phospho-L-lactate transferase activity     | embryo development ending in seed dormancy      | mitochondrion        |
| AT2G38240 | JAO4        | 2.61        | 2-oxoglutarate (2OG) and Fe(II)-dependent oxygenase-like protein | jasmonic acid hydrolase                              | defense response to fungus                      | cytoplasm            |
| AT2G44240 | AT2G44240   | 4.85        | NEP-interacting protein (DUF239)                                 |                                                      | response to oxidative stress                    | extracellular region |
| AT3G10300 | AT3G10300   | 2.06        | Calcium-binding EF-hand family protein                           | calcium ion binding                                  | hormone-mediated signaling pathway              | nucleus              |
| AT3G14415 | GOX2        | 2.61        | Aldolase-type TIM barrel family protein                          | (S)-2-hydroxy-acid oxidase activity                  | defense response to bacterium                   | apoplast             |
| AT3G21500 | DXS2        | 3.31        | 1-deoxy-D-xylulose 5-phosphate synthase 1                        | NOT 1-deoxy-D-xylulose-5-phosphate synthase activity | terpenoid biosynthetic process                  | chloroplast          |
| AT3G23420 | AT3G23420   | 3.12        | F-box and associated interaction domain-containing protein       |                                                      |                                                 |                      |
| AT3G27503 | SCRL19      | 2.24        | SCR-like 19                                                      |                                                      | signal transduction                             | extracellular region |
| AT3G28220 | AT3G28220   | 2.97        | TRAF-like family protein                                         |                                                      | alpha-amino acid metabolic process              | chloroplast envelope |
| AT3G30720 | QQS         | 2.56        | qua-quine starch                                                 | protein binding                                      | negative regulation of starch metabolic process | cytosol              |
| AT3G43572 | AT3G43572   | 2.42        | uncharacterized protein                                          |                                                      |                                                 |                      |
| AT3G43850 | AT3G43850   | 3.05        | uncharacterized protein                                          |                                                      | defense response to bacterium                   | nucleus              |



| Locus tag        | Gene symbol      | Fold change | Gene description                                            | Gene Ontology                      |                                                           |                      |
|------------------|------------------|-------------|-------------------------------------------------------------|------------------------------------|-----------------------------------------------------------|----------------------|
|                  |                  |             |                                                             | Molecular function                 | Biological process                                        | Cellular component   |
| <i>AT3G49840</i> | <i>AT3G49840</i> | 3.15        | uncharacterized transmembrane protein                       |                                    | chromatin organization                                    | nuclear membrane     |
| <i>AT3G55970</i> | <i>JOX3</i>      | 3.72        | jasmonate-regulated protein JRG21                           | jasmonic acid hydrolase            | defense response to fungus                                | cytoplasm            |
| <i>AT3G60120</i> | <i>BGLU27</i>    | 2.93        | beta glucosidase 27                                         | scopolin beta-glucosidase activity | carbohydrate metabolic process                            | nucleus              |
| <i>AT3G62950</i> | <i>AT3G62950</i> | 2.61        | Thioredoxin superfamily protein                             | protein binding                    | negative regulation of transcription by RNA polymerase II | cytoplasm            |
| <i>AT4G10265</i> | <i>AT4G10265</i> | 4.76        | Wound-responsive family protein                             |                                    | cellular response to hypoxia                              | nucleus              |
| <i>AT4G11911</i> | <i>AT4G11911</i> | 2.53        | STAY-GREEN-like protein                                     |                                    |                                                           |                      |
| <i>AT4G14315</i> | <i>AT4G14315</i> | 3.35        | uncharacterized protein                                     |                                    | regulation of developmental process                       |                      |
| <i>AT4G16590</i> | <i>CSLA01</i>    | 3.37        | cellulose synthase-like A01                                 | glycosyltransferase activity       | anthocyanin-containing compound metabolic process         | Golgi apparatus      |
| <i>AT4G22650</i> | <i>AT4G22650</i> | 4.88        | lipid transfer protein                                      |                                    |                                                           | extracellular region |
| <i>AT4G23520</i> | <i>AT4G23520</i> | 3.30        | Cysteine proteinases superfamily protein                    |                                    |                                                           |                      |
| <i>AT4G26390</i> | <i>AT4G26390</i> | 2.20        | Pyruvate kinase family protein                              | magnesium ion binding              | glycolytic process                                        | cytoplasm            |
| <i>AT4G26880</i> | <i>AT4G26880</i> | 2.41        | Stigma-specific Stig1 family protein                        |                                    | tissue development                                        | extracellular region |
| <i>AT4G30064</i> | <i>LCR61</i>     | 2.25        | low-molecular-weight cysteine-rich 61                       |                                    | defense response to bacterium                             | extracellular region |
| <i>AT4G33230</i> | <i>AT4G33230</i> | 2.43        | Plant invertase/pectin methylesterase inhibitor superfamily |                                    | cell wall modification                                    |                      |



[illegible]



| Locus tag        | Gene symbol      | Fold change | Gene description                                         | Gene Ontology                           |                                                                  |                      |
|------------------|------------------|-------------|----------------------------------------------------------|-----------------------------------------|------------------------------------------------------------------|----------------------|
|                  |                  |             |                                                          | Molecular function                      | Biological process                                               | Cellular component   |
| <i>AT1G03880</i> | <i>CRU2</i>      | 0.20        | cruciferin 2                                             | nutrient reservoir activity             | cellular response to abscisic acid stimulus                      |                      |
| <i>AT1G06280</i> | <i>LBD2</i>      | 0.34        | LOB domain-containing protein 2                          |                                         |                                                                  | nucleus              |
| <i>AT1G07430</i> | <i>HAI2</i>      | 0.49        | highly ABA-induced PP2C protein 2                        | myosin phosphatase activity             | negative regulation of abscisic acid-activated signaling pathway | chloroplast          |
| <i>AT1G09080</i> | <i>BIP3</i>      | 0.49        | Heat shock protein 70 (Hsp 70) family protein            | ATP-dependent protein folding chaperone | pollen tube growth                                               | chloroplast          |
| <i>AT1G09510</i> | <i>AT1G09510</i> | 0.15        | NAD(P)-binding Rossmann-fold superfamily protein         | alcohol dehydrogenase (NAD+) activity   |                                                                  |                      |
| <i>AT1G18350</i> | <i>MKK7</i>      | 0.45        | MAP kinase kinase 7                                      | kinase activity                         | auxin polar transport                                            |                      |
| <i>AT1G43890</i> | <i>RAB18</i>     | 0.23        | RAB GTPASE HOMOLOG B18                                   |                                         |                                                                  |                      |
| <i>AT1G45223</i> | <i>AT1G45223</i> | 0.35        | ECA1 gametogenesis related family protein                |                                         |                                                                  | extracellular region |
| <i>AT1G52690</i> | <i>LEA7</i>      | 0.31        | Late embryogenesis abundant protein (LEA) family protein |                                         | protein stabilization                                            | cytosol              |
| <i>AT1G57760</i> | <i>AT1G57760</i> | 0.31        | ECA1 gametogenesis related family protein                |                                         |                                                                  | extracellular region |
| <i>AT1G60190</i> | <i>PUB19</i>     | 0.27        | ARM repeat superfamily protein                           | ubiquitin-protein transferase activity  | regulation of seed germination                                   | chloroplast          |
| <i>AT1G68250</i> | <i>AT1G68250</i> | 0.18        | uncharacterized protein                                  |                                         |                                                                  |                      |
| <i>AT1G71000</i> | <i>AT1G71000</i> | 0.44        | Chaperone DnaJ-domain superfamily protein                |                                         | defense response to fungus                                       | cytoplasm            |
| <i>AT1G72980</i> | <i>LBD7</i>      | 0.50        | LOB domain-containing protein 7                          |                                         |                                                                  | nucleus              |



| Locus tag        | Gene symbol      | Fold change | Gene description                                            | Gene Ontology                             |                                            |                               |
|------------------|------------------|-------------|-------------------------------------------------------------|-------------------------------------------|--------------------------------------------|-------------------------------|
|                  |                  |             |                                                             | Molecular function                        | Biological process                         | Cellular component            |
| <i>AT1G80260</i> | <i>emb1427</i>   | 0.49        | Spc97 / Spc98 family of spindle pole body (SBP) component   | gamma-tubulin binding                     | embryo development ending in seed dormancy | microtubule organizing center |
| <i>AT2G02700</i> | <i>AT2G02700</i> | 0.30        | cysteine/histidine-rich C1 domain-containing protein        |                                           |                                            | nucleus                       |
| <i>AT2G03090</i> | <i>EXPA15</i>    | 0.40        | expansin A15                                                |                                           | plant-type cell wall loosening             | extracellular region          |
| <i>AT2G15010</i> | <i>AT2G15010</i> | 0.24        | Plant thionin                                               |                                           | defense response                           | extracellular region          |
| <i>AT2G18340</i> | <i>AT2G18340</i> | 0.44        | late embryogenesis abundant domain-containing protein       |                                           | response to water deprivation              | endoplasmic reticulum         |
| <i>AT2G26150</i> | <i>HSFA2</i>     | 0.48        | heat stress transcription factor A2                         | DNA-binding transcription factor activity | cellular response to hypoxia               | nucleus                       |
| <i>AT2G28090</i> | <i>AT2G28090</i> | 0.48        | Heavy metal transport/detoxification superfamily protein    |                                           |                                            | nucleus                       |
| <i>AT2G28860</i> | <i>CYP710A4</i>  | 0.32        | cytochrome P450 710A4                                       | C-22 sterol desaturase activity           | sterol biosynthetic process                | extracellular region          |
| <i>AT2G29380</i> | <i>HAI3</i>      | 0.42        | highly ABA-induced PP2C protein 3                           | myosin phosphatase activity               |                                            | nucleus                       |
| <i>AT2G34370</i> | <i>AT2G34370</i> | 0.38        | Pentatricopeptide repeat (PPR) superfamily protein          | zinc ion binding                          |                                            | mitochondrion                 |
| <i>AT2G42000</i> | <i>AtMT4a</i>    | 0.29        | plant EC metallothionein family protein                     | zinc ion binding                          | zinc ion transport                         | cytoplasm                     |
| <i>AT2G42560</i> | <i>AT2G42560</i> | 0.24        | late embryogenesis abundant domain-containing protein       |                                           | cold acclimation                           | cytosol                       |
| <i>AT2G47770</i> | <i>TSPO</i>      | 0.46        | outer membrane tryptophan-rich sensory protein-like protein | heme binding                              | response to abscisic acid                  | Golgi apparatus               |
| <i>AT3G01326</i> | <i>AT3G01326</i> | 0.39        | ECA1 gametogenesis related family protein                   |                                           |                                            |                               |



| Locus tag        | Gene symbol      | Fold change | Gene description                                                         | Gene Ontology                                                             |                                            |                       |
|------------------|------------------|-------------|--------------------------------------------------------------------------|---------------------------------------------------------------------------|--------------------------------------------|-----------------------|
|                  |                  |             |                                                                          | Molecular function                                                        | Biological process                         | Cellular component    |
| <i>AT3G02480</i> | <i>AT3G02480</i> | 0.35        | Late embryogenesis abundant protein (LEA) family protein                 |                                                                           | negative regulation of leaf senescence     | cytosol               |
| <i>AT3G11480</i> | <i>BSMT1</i>     | 0.30        | S-adenosyl-L-methionine-dependent methyltransferases superfamily protein | S-adenosyl-L-methionine:benzoic acid carboxyl methyl transferase activity | defense response                           | nucleus               |
| <i>AT3G14440</i> | <i>NCED3</i>     | 0.49        | 9-cis-epoxycarotenoid dioxygenase 3                                      | 9-cis-epoxycarotenoid dioxygenase activity                                | abscisic acid biosynthetic process         | chloroplast           |
| <i>AT3G17520</i> | <i>AT3G17520</i> | 0.42        | late embryogenesis abundant protein (LEA) family protein                 |                                                                           | acquisition of seed longevity              | endoplasmic reticulum |
| <i>AT3G20160</i> | <i>GGPPS8</i>    | 0.40        | Terpenoid synthases superfamily protein                                  | dimethylallyltranstransferase activity                                    | farnesyl diphosphate biosynthetic process  | chloroplast           |
| <i>AT3G22640</i> | <i>PAP85</i>     | 0.37        | cupin family protein                                                     |                                                                           | response to virus                          | extracellular region  |
| <i>AT3G25810</i> | <i>AT3G25810</i> | 0.39        | Terpenoid cyclases/Protein prenyltransferases superfamily protein        | (4S)-limonene synthase activity                                           | monoterpene biosynthetic process           | chloroplast           |
| <i>AT3G27025</i> | <i>AT3G27025</i> | 0.48        | uncharacterized protein                                                  |                                                                           | regulation of auxin polar transport        | chloroplast           |
| <i>AT3G49620</i> | <i>DIN11</i>     | 0.47        | 2-oxoglutarate (2OG) and Fe(II)-dependent oxygenase superfamily protein  |                                                                           | cellular response to starvation            | cytoplasm             |
| <i>AT3G54490</i> | <i>RPB5E</i>     | 0.34        | RNA polymerase II fifth largest subunit, E                               | DNA binding                                                               | DNA-templated transcription                | nucleus               |
| <i>AT3G58390</i> | <i>AT3G58390</i> | 0.26        | Eukaryotic release factor 1 (eRF1) family protein                        | protein binding                                                           | nuclear-transcribed mRNA catabolic process | nucleus               |



| Locus tag | Gene symbol | Fold change | Gene description                                                         | Gene Ontology                               |                                             |                      |
|-----------|-------------|-------------|--------------------------------------------------------------------------|---------------------------------------------|---------------------------------------------|----------------------|
|           |             |             |                                                                          | Molecular function                          | Biological process                          | Cellular component   |
| AT4G03480 | AT4G03480   | 0.31        | Ankyrin repeat family protein                                            |                                             | defense response to bacterium               | chloroplast          |
| AT4G09600 | GASA3       | 0.32        | GAST1 protein homolog 3                                                  |                                             | response to gibberellin                     | extracellular region |
| AT4G10250 | ATHSP22.0   | 0.40        | HSP20-like chaperones superfamily protein                                |                                             | cellular response to hypoxia                | chloroplast          |
| AT4G27140 | SESA1       | 0.07        | seed storage albumin 1                                                   |                                             | defense response                            | extracellular region |
| AT4G27150 | SESA2       | 0.12        | seed storage albumin 2                                                   |                                             |                                             | extracellular region |
| AT4G27160 | SESA3       | 0.30        | seed storage albumin 3                                                   | protein histidine kinase binding            | seed maturation                             | extracellular region |
| AT4G28520 | CRU3        | 0.09        | cruciferin 3                                                             | nutrient reservoir activity                 | cellular response to abscisic acid stimulus | protein body         |
| AT4G33467 | AT4G33467   | 0.20        | uncharacterized protein                                                  |                                             | response to abscisic acid                   | nucleus              |
| AT4G33905 | AT4G33905   | 0.47        | Peroxisomal membrane 22 kDa                                              |                                             | response to abscisic acid                   | mitochondrion        |
| AT4G37990 | ELI3-2      | 0.47        | cinnamyl alcohol dehydrogenase 8                                         | aryl-alcohol dehydrogenase (NADP+) activity | lignin biosynthetic process                 | cytoplasm            |
| AT5G03210 | DIP2        | 0.42        | E3 ubiquitin-protein ligase                                              |                                             | defense response to virus                   | nucleus              |
| AT5G04120 | AT5G04120   | 0.41        | Phosphoglycerate mutase family protein                                   | L-phosphoserine phosphatase activity        | D-serine biosynthetic process               | cytoplasm            |
| AT5G04380 | AT5G04380   | 0.17        | S-adenosyl-L-methionine-dependent methyltransferases superfamily protein |                                             |                                             | nucleus              |



| Locus tag | Gene symbol | Fold change | Gene description                                                            | Gene Ontology                             |                                                               |                      |
|-----------|-------------|-------------|-----------------------------------------------------------------------------|-------------------------------------------|---------------------------------------------------------------|----------------------|
|           |             |             |                                                                             | Molecular function                        | Biological process                                            | Cellular component   |
| AT5G05220 | AT5G05220   | 0.15        | uncharacterized protein                                                     |                                           | abscisic acid-activated signaling pathway                     | chloroplast          |
| AT5G06760 | LEA4-5      | 0.23        | late embryogenesis abundant protein 4-5                                     | osmosensor activity                       | response to osmotic stress                                    | cytosol              |
| AT5G07260 | AT5G07260   | 0.48        | START (StAR-related lipid-transfer) lipid-binding domain-containing protein | lipid binding                             | somatic embryogenesis                                         | nucleus              |
| AT5G24080 | AT5G24080   | 0.49        | Protein kinase superfamily protein                                          | protein serine/threonine kinase activity  | response to abscisic acid                                     | extracellular region |
| AT5G27260 | AT5G27260   | 0.47        | Myb/SANT-like DNA-binding domain protein                                    |                                           |                                                               | nucleus              |
| AT5G34905 | AT5G34905   | 0.41        | ECA1 gametogenesis family protein                                           |                                           |                                                               | chloroplast          |
| AT5G35660 | AT5G35660   | 0.39        | glycine-rich protein                                                        |                                           |                                                               |                      |
| AT5G40790 | AT5G40790   | 0.35        | uncharacterized protein                                                     |                                           | negative regulation of DNA-templated transcription initiation | nucleus              |
| AT5G42797 | LCR28       | 0.39        | low-molecular-weight cysteine-rich 28                                       |                                           |                                                               |                      |
| AT5G43840 | HSFA6A      | 0.48        | heat stress transcription factor A6A                                        | DNA-binding transcription factor activity | regulation of DNA-templated transcription                     | nucleus              |
| AT5G45630 | AT5G45630   | 0.40        | senescence regulator                                                        |                                           | response to abscisic acid                                     | cytoplasm            |
| AT5G50360 | AT5G50360   | 0.27        | von Willebrand factor A domain protein                                      |                                           | negative regulation of DNA-templated transcription initiation | nucleus              |



| Locus tag        | Gene symbol      | Fold change | Gene description                             | Gene Ontology                                         |                                    |                      |
|------------------|------------------|-------------|----------------------------------------------|-------------------------------------------------------|------------------------------------|----------------------|
|                  |                  |             |                                              | Molecular function                                    | Biological process                 | Cellular component   |
| <i>AT5G50600</i> | <i>HSD1</i>      | 0.28        | hydroxysteroid dehydrogenase 1               | 11-beta-hydroxysteroid dehydrogenase (NADP+) activity | response to abscisic acid          | chloroplast          |
| <i>AT5G52300</i> | <i>LTl65</i>     | 0.36        | low-temperature-induced 65                   |                                                       | response to abscisic acid          | cytoplasm            |
| <i>AT5G53710</i> | <i>AT5G53710</i> | 0.49        | uncharacterized protein                      |                                                       | response to abscisic acid          | mitochondrion        |
| <i>AT5G53905</i> | <i>AT5G53905</i> | 0.43        | prolamin-like protein                        |                                                       | macromolecule biosynthetic process | nucleus              |
| <i>AT5G54740</i> | <i>SESA5</i>     | 0.02        | seed storage albumin 5                       |                                                       | pollen development                 | extracellular region |
| <i>AT5G65800</i> | <i>ACS5</i>      | 0.43        | 1-aminocyclopropane-1-carboxylate synthase 5 | 1-aminocyclopropane-1-carboxylate synthase activity   | ethylene biosynthetic process      | cytoplasm            |
