# Supplementary material for: Bacterial Volatiles (mVOC) Emitted by the Phytopathogen Erwinia amylovora Promote Arabidopsis thaliana Growth and Oxidative Stress
Source: MDPI journal article supplement (doi:10.3390/antiox12030600), 2023-02-28
Supplement: s1 [file s1]

# Supplementary Figure S3 Functional Categorization

## UPREGULATED GENES

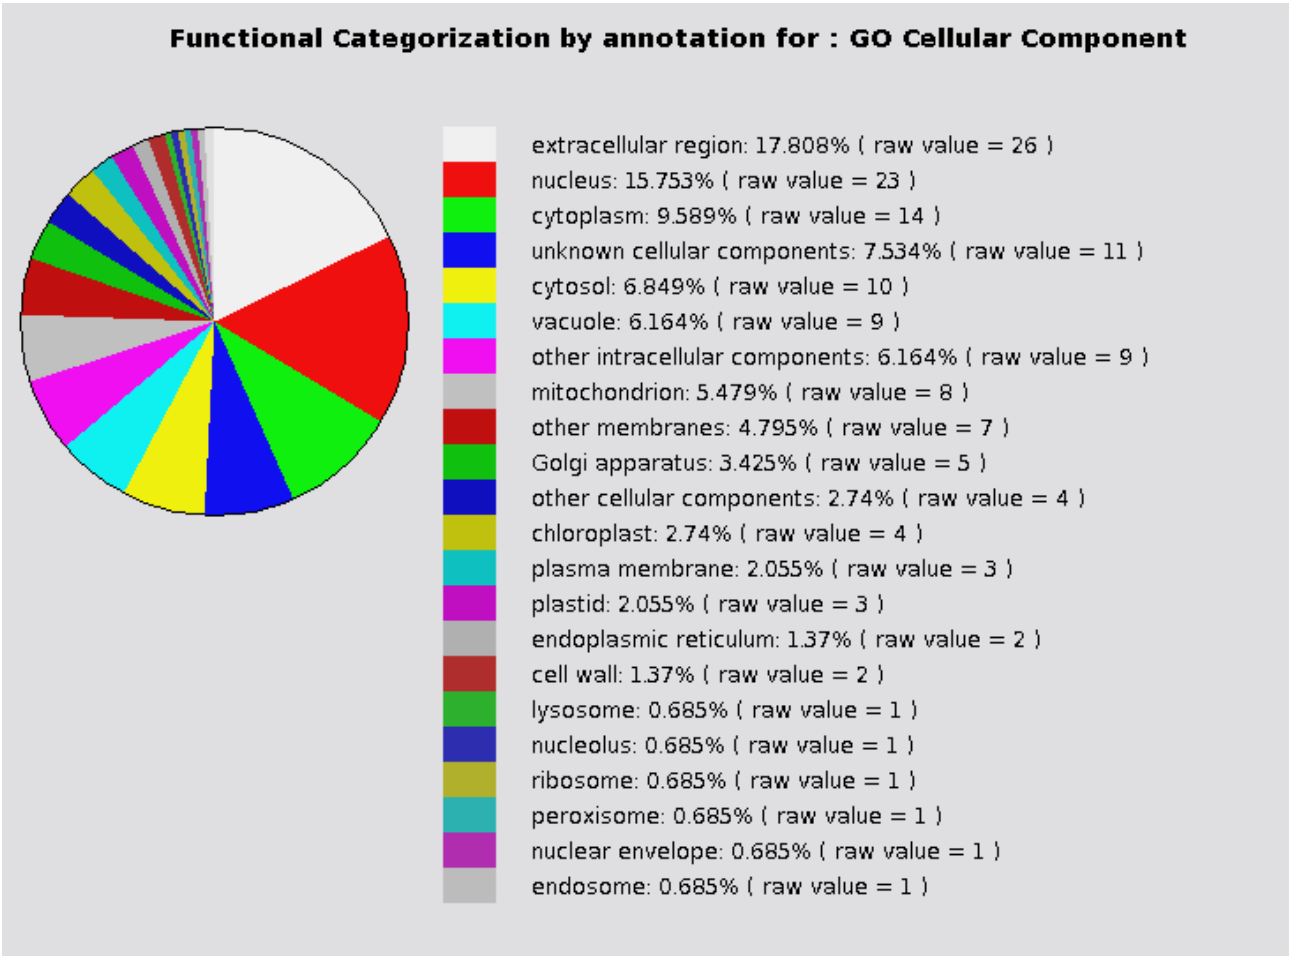

## Functional Categorization by annotation for : GO Biological Process

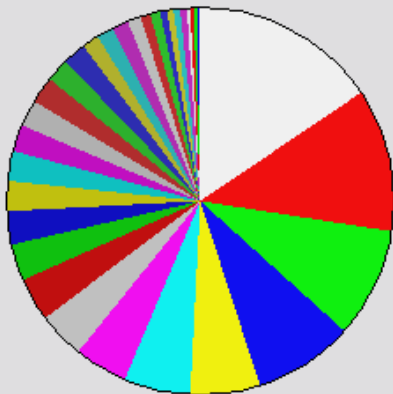

|                                                   |                            |
|---------------------------------------------------|----------------------------|
| other cellular processes:                         | 15.645% ( raw value = 74 ) |
| other metabolic processes:                        | 12.051% ( raw value = 57 ) |
| response to stress:                               | 9.302% ( raw value = 44 )  |
| response to chemical:                             | 8.457% ( raw value = 40 )  |
| biosynthetic process:                             | 5.92% ( raw value = 28 )   |
| unknown biological processes:                     | 5.497% ( raw value = 26 )  |
| response to external stimulus:                    | 4.44% ( raw value = 21 )   |
| response to biotic stimulus:                      | 4.017% ( raw value = 19 )  |
| response to endogenous stimulus:                  | 3.594% ( raw value = 17 )  |
| response to abiotic stimulus:                     | 3.171% ( raw value = 15 )  |
| catabolic process:                                | 2.748% ( raw value = 13 )  |
| signal transduction:                              | 2.537% ( raw value = 12 )  |
| protein metabolic process:                        | 2.537% ( raw value = 12 )  |
| reproduction:                                     | 2.114% ( raw value = 10 )  |
| anatomical structure development:                 | 2.114% ( raw value = 10 )  |
| cellular component organization:                  | 2.114% ( raw value = 10 )  |
| transport:                                        | 1.903% ( raw value = 9 )   |
| multicellular organism development:               | 1.903% ( raw value = 9 )   |
| nucleobase-containing compound metabolic process: | 1.48% ( raw value = 7 )    |
| carbohydrate metabolic process:                   | 1.48% ( raw value = 7 )    |
| secondary metabolic process:                      | 1.268% ( raw value = 6 )   |
| post-embryonic development:                       | 1.057% ( raw value = 5 )   |
| cell communication:                               | 0.846% ( raw value = 4 )   |
| lipid metabolic process:                          | 0.846% ( raw value = 4 )   |
| other biological processes:                       | 0.634% ( raw value = 3 )   |
| growth:                                           | 0.634% ( raw value = 3 )   |
| cell growth:                                      | 0.423% ( raw value = 2 )   |
| cell differentiation:                             | 0.423% ( raw value = 2 )   |
| translation:                                      | 0.211% ( raw value = 1 )   |
| response to light stimulus:                       | 0.211% ( raw value = 1 )   |
| generation of precursor metabolites and energy:   | 0.211% ( raw value = 1 )   |
| tropism:                                          | 0.211% ( raw value = 1 )   |

### Functional Categorization by annotation for : GO Molecular Function

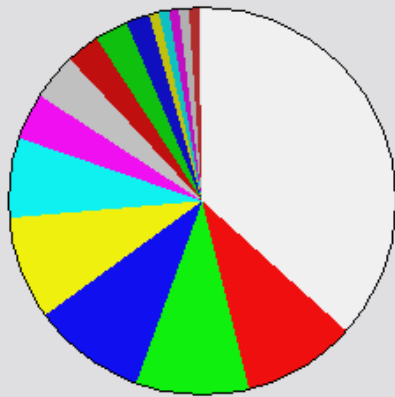

|  |                                                                     |
|--|---------------------------------------------------------------------|
|  | unknown molecular functions: 36.792% ( raw value = 39 )             |
|  | hydrolase activity: 9.434% ( raw value = 10 )                       |
|  | protein binding: 9.434% ( raw value = 10 )                          |
|  | transferase activity: 9.434% ( raw value = 10 )                     |
|  | catalytic activity: 8.491% ( raw value = 9 )                        |
|  | transporter activity: 6.604% ( raw value = 7 )                      |
|  | RNA binding: 3.774% ( raw value = 4 )                               |
|  | other binding: 3.774% ( raw value = 4 )                             |
|  | enzyme regulator activity: 2.83% ( raw value = 3 )                  |
|  | other molecular functions: 2.83% ( raw value = 3 )                  |
|  | DNA binding: 1.887% ( raw value = 2 )                               |
|  | DNA-binding transcription factor activity: 0.943% ( raw value = 1 ) |
|  | nucleotide binding: 0.943% ( raw value = 1 )                        |
|  | lipid binding: 0.943% ( raw value = 1 )                             |
|  | structural molecule activity: 0.943% ( raw value = 1 )              |
|  | nucleic acid binding: 0.943% ( raw value = 1 )                      |

# DOWNREGULATED GENES

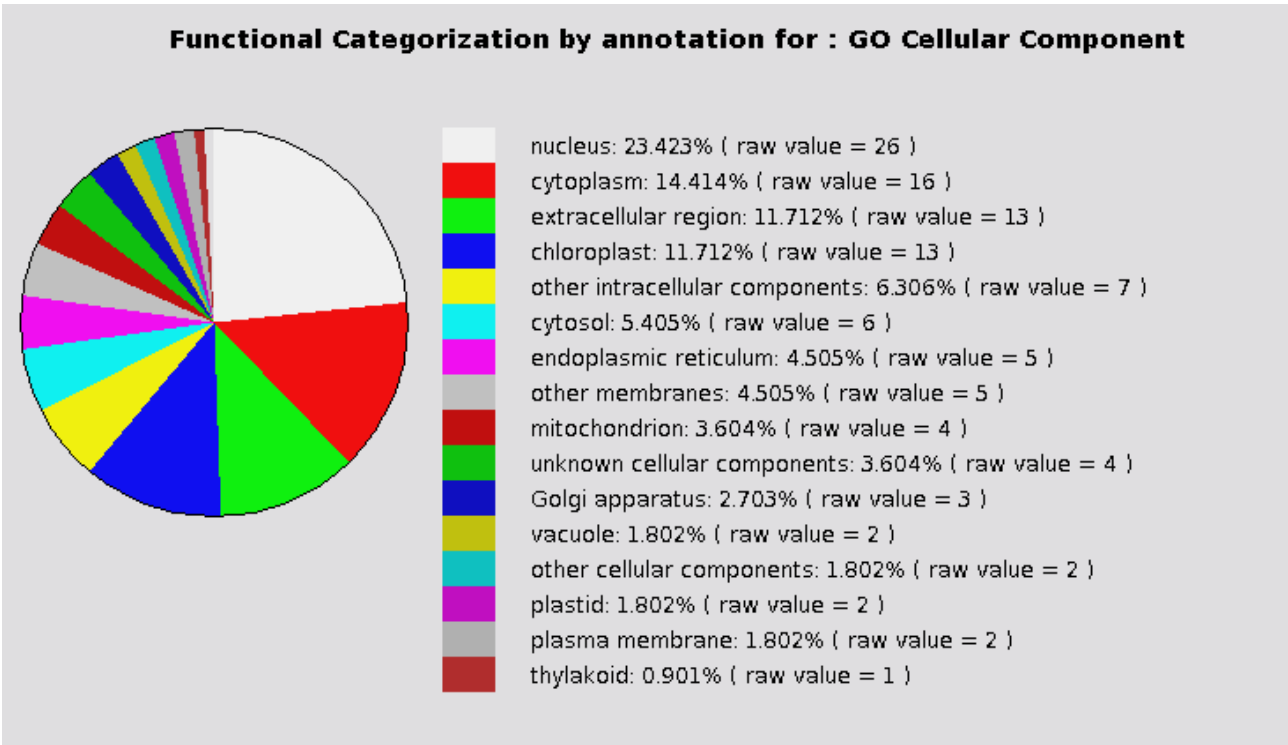

## Functional Categorization by annotation for : GO Biological Process

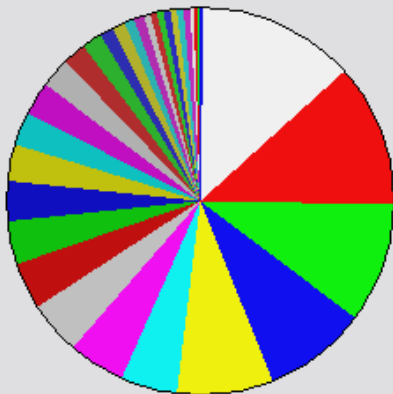

|  |                                                                            |
|--|----------------------------------------------------------------------------|
|  | other cellular processes: 13.216% ( raw value = 60 )                       |
|  | response to stress: 11.894% ( raw value = 54 )                             |
|  | response to chemical: 10.132% ( raw value = 46 )                           |
|  | other metabolic processes: 8.59% ( raw value = 39 )                        |
|  | response to abiotic stimulus: 7.93% ( raw value = 36 )                     |
|  | response to endogenous stimulus: 4.846% ( raw value = 22 )                 |
|  | anatomical structure development: 4.626% ( raw value = 21 )                |
|  | biosynthetic process: 4.405% ( raw value = 20 )                            |
|  | multicellular organism development: 3.965% ( raw value = 18 )              |
|  | reproduction: 3.744% ( raw value = 17 )                                    |
|  | post-embryonic development: 3.304% ( raw value = 15 )                      |
|  | lipid metabolic process: 3.084% ( raw value = 14 )                         |
|  | response to external stimulus: 2.863% ( raw value = 13 )                   |
|  | response to biotic stimulus: 2.643% ( raw value = 12 )                     |
|  | unknown biological processes: 2.423% ( raw value = 11 )                    |
|  | nucleobase-containing compound metabolic process: 1.982% ( raw value = 9 ) |
|  | signal transduction: 1.542% ( raw value = 7 )                              |
|  | cell communication: 1.101% ( raw value = 5 )                               |
|  | catabolic process: 1.101% ( raw value = 5 )                                |
|  | transport: 0.881% ( raw value = 4 )                                        |
|  | response to light stimulus: 0.881% ( raw value = 4 )                       |
|  | pollination: 0.661% ( raw value = 3 )                                      |
|  | embryo development: 0.661% ( raw value = 3 )                               |
|  | cellular component organization: 0.661% ( raw value = 3 )                  |
|  | other biological processes: 0.661% ( raw value = 3 )                       |
|  | secondary metabolic process: 0.441% ( raw value = 2 )                      |
|  | cell growth: 0.441% ( raw value = 2 )                                      |
|  | growth: 0.441% ( raw value = 2 )                                           |
|  | tropism: 0.22% ( raw value = 1 )                                           |
|  | protein metabolic process: 0.22% ( raw value = 1 )                         |
|  | cell differentiation: 0.22% ( raw value = 1 )                              |
|  | cell death: 0.22% ( raw value = 1 )                                        |

### Functional Categorization by annotation for : GO Molecular Function

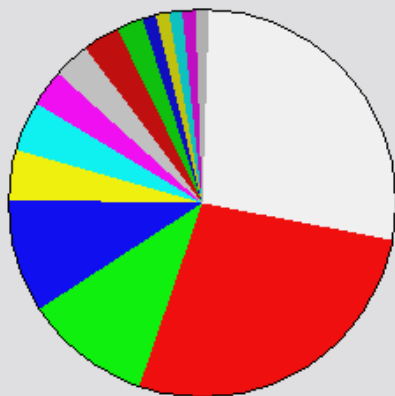

|                                            |                            |
|--------------------------------------------|----------------------------|
| unknown molecular functions:               | 28.125% ( raw value = 27 ) |
| catalytic activity:                        | 27.083% ( raw value = 26 ) |
| transferase activity:                      | 10.417% ( raw value = 10 ) |
| protein binding:                           | 9.375% ( raw value = 9 )   |
| hydrolase activity:                        | 4.167% ( raw value = 4 )   |
| kinase activity:                           | 4.167% ( raw value = 4 )   |
| DNA binding:                               | 3.125% ( raw value = 3 )   |
| other binding:                             | 3.125% ( raw value = 3 )   |
| other molecular functions:                 | 3.125% ( raw value = 3 )   |
| nucleic acid binding:                      | 2.083% ( raw value = 2 )   |
| signaling receptor activity:               | 1.042% ( raw value = 1 )   |
| RNA binding:                               | 1.042% ( raw value = 1 )   |
| DNA-binding transcription factor activity: | 1.042% ( raw value = 1 )   |
| chromatin binding:                         | 1.042% ( raw value = 1 )   |
| lipid binding:                             | 1.042% ( raw value = 1 )   |
