# Supplementary material for: Bacterial Volatiles (mVOC) Emitted by the Phytopathogen Erwinia amylovora Promote Arabidopsis thaliana Growth and Oxidative Stress
Source: MDPI journal article supplement (doi:10.3390/antiox12030600), 2023-02-28

## Supplementary Figure S6

Root length and production of secondary roots in representative portions of Petri dishes containing different concentrations of the two synthetic mVOCs

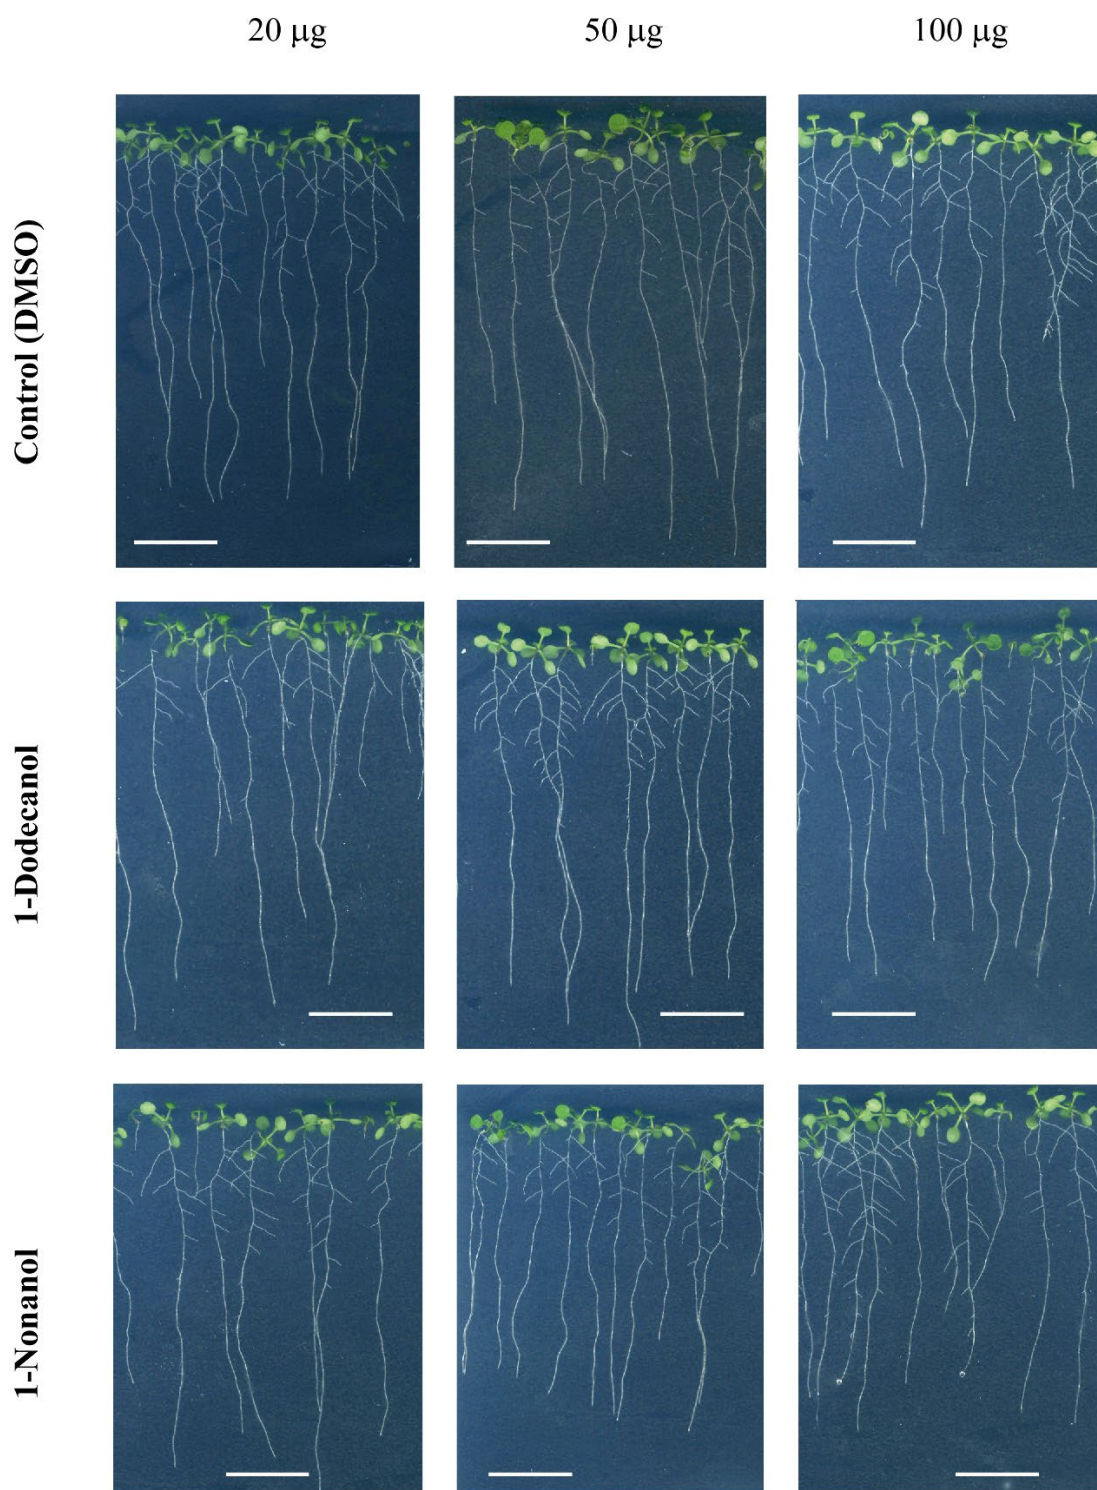

Supplement: s1 [file s1]
