# Supplementary material for: Bacterial Volatiles (mVOC) Emitted by the Phytopathogen Erwinia amylovora Promote Arabidopsis thaliana Growth and Oxidative Stress
Source: MDPI journal article supplement (doi:10.3390/antiox12030600), 2023-02-28

## Supplementary Figure S1

Seedlings of *A. thaliana* are cultivated in the presence of synthetic mVOCs. Arrow indicates the filter paper disk where the synthetic chemical is placed.

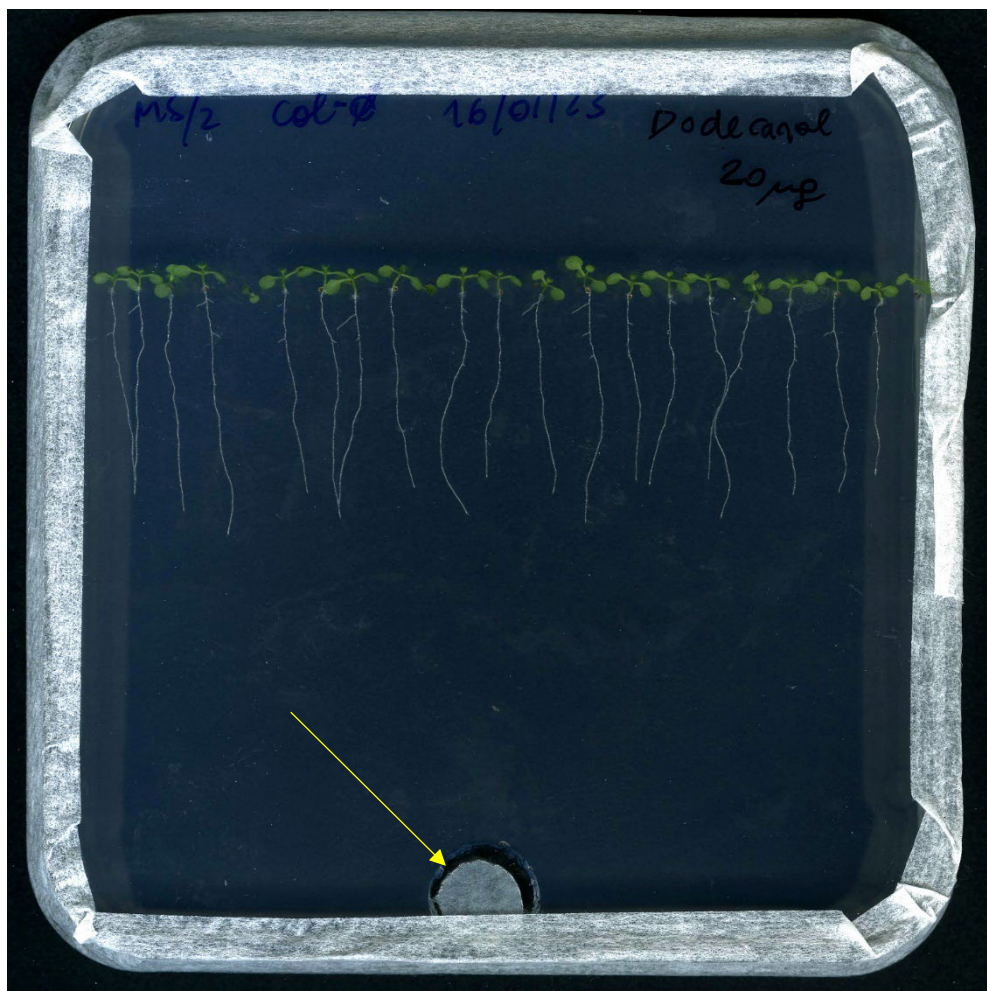

Supplement: s1 [file s1]
