# Supplementary material for: Bacterial Volatiles (mVOC) Emitted by the Phytopathogen Erwinia amylovora Promote Arabidopsis thaliana Growth and Oxidative Stress
Source: Antioxidants (Basel). 2023 Feb 28;12(3):600. doi: 10.3390/antiox12030600 (PMC10045578; doi:10.3390/antiox12030600)
Supplement: Supplementary file 1 [file antioxidants-12-00600-s001.zip › Supplementary Dataset S1.xlsx]

## Sheet: Gene expression and GO
	UPREGULATED GENES
Probe	Locus tag	Gene symbol	TIGRID	UniGenID	Gene description	FC	Molecular function	Biological process	Cellular component	Seq
A_84_P837504	AT2G02620	AT2G02620	NP456409	At.41475	cysteine/histidine-rich C1 domain-containing protein	2.80255			nucleus	CCTCTCCATGGTGAAAGTACGTCATATTATCATGTCGTACTCCCTCTGTTTTGGTGCAAC
A_84_P20469	AT4G26880	AT4G26880	TC390267	At.65424	Stigma-specific Stig1 family protein	2.40794		tissue development	extracellular region	AACAAATGCAAGTTCTCACAGACGTGTTGTCGCGGCCAATGTGTTTACGTAGCTTACGAT
A_84_P11383	AT1G65570	AT1G65570	TC371862	At.52380	Pectin lyase-like superfamily protein	2.14015	polygalacturonase activity	carbohydrate metabolic process	apoplast	GACTTCTTGCACCAATGTTTCTGGTAAGCAACTTGGATTGGTTACACCTAGTGGATGTCT
A_84_P18477	AT3G60120	BGLU27	TC366356	At.49400	beta glucosidase 27	2.92675	enables scopolin beta-glucosidase activity	carbohydrate metabolic process	nucleus	AACTGGTTCATCAGCTTCATGCTTTATTCCTAAGATGTCTGAATCTTCTAAAGCCCTCGA
A_84_P795912	AT5G14950	GMII		At.68063	golgi alpha-mannosidase II	2.13928	enables alpha-mannosidase activity	involved_in hyperosmotic salinity response	located_in Golgi apparatus	CCAAGTTGGTGAGTAACTTTTTTGGGGGTCGGTTACTGTTGTGGAGTAAGTCTAGTATCT
A_84_P273450	AT1G09935	AT1G09935	NP1660328	At.51544	Phosphoglycerate mutase family protein	2.45278	enables catalytic activity	involved_in biological_process		GCAAGAGGTTTGCCAATTGCGAAATTCGTACTGTCGTGATTGTAGACAAAGGCATGGCTT
A_84_P15382	AT2G30770	CYP71A13	TC391554	At.20309	cytochrome P450, family 71, subfamily A, polypeptide 13	4.16036	enables indoleacetaldoxime dehydratase activity	acts_upstream_of_or_within camalexin biosynthetic process	located_in endoplasmic reticulum lumen	CACTTAGATTCAGGTTTAGATTATCACGGAAAAAATCTGAACTACATCCCATTCGGATCA
A_84_P13535	AT2G38240	AT2G38240	TC370767	At.12463	2-oxoglutarate (2OG) and Fe(II)-dependent oxygenase-like protein	2.61164	enables jasmonic acid hydrolase	involved_in regulation of defense response to fungus	located_in cytoplasm	AACCAATCAGGTTCGACGAGTACCGTTCTCTGATAAGGCAAAAGGGTCCTTGTGGAAAAA
A_84_P12788	AT3G55970	JRG21	TC369784	At.5208	jasmonate-regulated protein JRG21	3.72415	enables jasmonic acid hydrolase	involved_in regulation of defense response to fungus	located_in cytoplasm	CACATACGATCGTTACCGTCAATTCATTCGTACGCAAGGCCCACGTAGCAAATGTCATAT
A_84_P10925	AT3G62950	AT3G62950	TC383847	At.34020	Thioredoxin superfamily protein	2.60789	enables protein binding	acts_upstream_of_or_within negative regulation of transcription by RNA polymerase II	located_in cytoplasm	ATTTGTCGTCGAAGAAAGCGGCGGTGATATTCACAAAGAGCTCATGTTGTATGTGCCATA
A_84_P293824	AT5G39650	DAU2	TC376512	At.30332	DAU2 transmembrane protein, putative (DUF679)	7.08097	enables molecular carrier activity	acts_upstream_of_or_within double fertilization forming a zygote and endosperm	located_in endoplasmic reticulum lumen	GTTTGTAGTGCTTTGTTTCTTGTTTTTCCGACCACTCGATATGGTGTTGGTTGCATGACT
A_84_P15135	AT1G30950	UFO	TC369889	At.51845	UNUSUAL FLORAL ORGANS F-box family protein	2.4067	enables transcription factor binding	acts_upstream_of_or_within SCF-dependent proteasomal ubiquitin-dependent protein catabolic process	part_of ubiquitin ligase complex	AGGGTTTTGCTTATGACCCGGTGCTTACTACACCGGTGGTTAGTCTTCTTGATCAGTTAA
A_84_P17983	AT1G60570	AT1G60570	TC372612	At.66064	Galactose oxidase/kelch repeat superfamily protein	2.06096			located_in cytoplasm	GAAGGTCGAGTGGTTTGGTCCAGTGCTTCCAAATCAAATTCCCCTGGAATATGCATTTGA
A_84_P573586	AT5G53260	AT5G53260	TC387064	At.55521	Seed maturation protein	2.29326			located_in cytosol	GAGGTGTTGCTGAATCCGTCGCTGCAGCTTATAAACTTAATCACGATCCATCGTCTCTTT
A_84_P22796	AT1G79800	ENODL7	TC385404	At.75277	early nodulin-like protein 7	3.5806	enables electron transfer activity		located_in membrane	CCCTGCCTACGGCTTGTCTTCTTATTCCTCTTTTCTTAACCATTGCTAGCTTTCGTTTCA
A_84_P22940	AT2G26450	AT2G26450	TC361828	At.38894	Plant invertase/pectin methylesterase inhibitor superfamily	2.05518		acts_upstream_of_or_within cell differentiation		TTCTTACAAGGAGATTGGATCAGTGCCTCAGGCTCTCCCGTTAAGTTGGGTCTTTATGAT
A_84_P18080	AT1G50060	AT1G50060	TC388927	At.38103	CAP (Cysteine-rich secretory proteins, Antigen 5, and Pathogenesis-related 1 protein) superfamily protein	2.80466			located_in extracellular region	GTTCAATGCACCAATACTTGGTGGTTCGTGAGTTGTAACTATAACTCACCCGGTAATTGG
A_84_P11564	AT1G64160	DIR5	TC378057	At.36042	Disease resistance-responsive (dirigent-like protein) family protein	4.24243	enables guiding stereospecific synthesis activity	acts_upstream_of_or_within (-)-pinoresinol biosynthetic process	located_in extracellular region	CATGTCTCGAGGGATTGTTACGTTTGAGACCGATACCTTTGAAGGTGCTAAGTATTTTAG
A_84_P14336	AT1G72260	THI2.1	TC402464	At.25077	thionin 2.1	4.35087	enables toxin activity	acts_upstream_of_or_within jasmonic acid mediated signaling pathway	located_in extracellular region	ATTGTGAATGGAGCGTCGGAACAATGTGCCAAGGGATGTTCTATTTTCTGTACCAAGAGC
A_84_P17268	AT2G14610	PR1	TC380268	At.321	pathogenesis-related protein 1	2.09623		acts_upstream_of_or_within defense response	located_in extracellular region	TCTTGTTCTTCCCTCGAAAGCTCAAGATAGCCCACAAGATTATCTAAGGGTTCACAACCA
A_84_P584962	AT4G22650	AT4G22650	TC389651	At.54481	lipid transfer protein	4.87575			located_in extracellular region	CATGCGACGGTACTTTTTCTTTGGTTTTCCTTTTGGATCTTTTGTGGTTTATCAGAAGTT
A_84_P19507	AT4G23520	AT4G23520	TC387921	At.32421	Cysteine proteinases superfamily protein	3.29601				AGGTCTCTGTGGAATTGCGATGCTTGCTTCATATCCTATTAAGAATTCGGCTTCCAATGC
A_84_P15194	AT1G54020	AT1G54020	TC392193	At.20006	GDSL-like Lipase/Acylhydrolase superfamily protein	2.60114				ACTTCGACGCACGTCATAACACAGAGAAAGCACAAGAAGCGTTTGCTCATCTTATCTTTG
A_84_P16713	AT4G33230	AT4G33230	TC364068	At.54586	Plant invertase/pectin methylesterase inhibitor superfamily	2.42905		involved_in cell wall modification		GCCTGGATTTAGGGTTTTAAACAAGGAAGAGGCGATGAAATTTACGGTGGGGCCATTCTT
A_84_P571250	AT2G22060	AT2G22060	TC372484	At.39487	galactose oxidase/kelch repeat protein	2.6229			located_in mitochondrion	TTCTGCGTTGCTTAGTTGTTTCTCACTGATTAGCTCATATGATTTTATGTGCCGTTCCCT
A_84_P73494	AT2G34090	MEE18	NP456982	At.37857	maternal effect embryo arrest 18 protein	2.01919	enables LPPG:FO 2-phospho-L-lactate transferase activity	acts_upstream_of_or_within embryo development ending in seed dormancy	located_in mitochondrion	CTTCACTTGTTTCCAAGTTTATGTGCACAACAAACACTCACTGTTACCTCCACTCTATTG
A_84_P769214	AT5G18748	AT5G18748	NP13351625	At.73419	uncharacterized protein	2.34514			located_in mitochondrion	CGTCTTCGTTTCTGGGGAGACACCTCACGGTTTATATGGTTCTCTGGTTTTACTGTAATT
A_84_P794439	AT3G49840	AT3G49840		At.67607	uncharacterized transmembrane protein	3.15421		acts_upstream_of_or_within chromatin organization	located_in nuclear membrane	TCTGAAGGATCAGAGTCACAGCAAAAGCTCGGATGGACCAAGTAGACTAAGATTGTATGT
A_84_P555274	AT2G26130	AT2G26130	NP1660640	At.52921	RING/U-box protein with C6HC-type zinc finger	2.46489	enables RNA-DNA hybrid ribonuclease activity	involved_in gibberellin mediated signaling pathway	located_in nucleus	GTGGTTCGTGCTGCTGTTTTGTTTTCTTTTTGGTGATAATTGCTATTGTGGTTACTATTA
A_84_P860874	AT3G14415	GOX2	TC367440	At.20363	Aldolase-type TIM barrel family protein	2.61283	enables (S)-2-hydroxy-acid oxidase activity	acts_upstream_of_or_within defense response to bacterium	located_in apoplast	CCATCTGATATTTGTCCGCATCTCCACAACCATTCTTCACCTCCAACTTCTCATCCATAT
A_84_P554127	AT1G06340	AT1G06340	TC392915	At.49437	plant Tudor-like protein	3.79767				GTGCTCTGTTTATTATTGCTCTTTCAAATTCTAGGGTTTGGTTTTCAGAGACATTGTTGC
A_84_P17054	AT1G09950	RAS1	TC375218	At.42201	response to ABA and salt 1	2.94487				TAAACTTATTTTATGGGTCGGCGATTTCAAGCCTTCTCTTGTGTTTAAACTCACCGAGGT
A_84_P828338	AT1G27461	AT1G27461	TC390625	At.47648	uncharacterized protein	2.87651	enables core promoter sequence-specific DNA binding	involved_in seed dormancy process	located_in cytosol	AACCTACCTCAAGTTGGCTACGGTTTTGAGAATGGTGTCTCTTCTACTTTGGTGACTTTG
A_84_P310053	AT2G11005	AT2G11005	NP2704531	At.52706	glycine-rich protein	2.02472			located_in nucleus	ATGGGGTGGTTGCTCTGGTGATGTCATTCGTTCTCGTAACGGGGGTAGCTCCGACGGCGA
A_84_P521632	AT2G32275	AT2G32275	NP1645868	At.49558	uncharacterized protein	2.0652			located_in nucleus	GTCTCTAGTTTTCTTCTCTTTAACAAAGCAAATTAGAATGGTGTTGTAATCGTATCGAGG
A_84_P799540	AT4G10265	AT4G10265		At.70459	Wound-responsive family protein	4.76318		acts_upstream_of_or_within cellular response to hypoxia	located_in nucleus	CTCTTGGTTTCTTTCTTGTTTAAGTGATTGGGTTTCGATTTGGTGTCGGTGGATGATCGG
A_84_P285420	AT4G39750	AT4G39750	TC359824	At.54659	F-box family protein-like protein	2.18702			located_in nucleus	TGTTCATCTTTAATCTTTATGGTGCTATGCGTTCATCCAAGGCAATGGTCCGTCCCCCTT
A_84_P766789	AT5G17100	AT5G17100	TC373164	At.54875	Cystatin/monellin superfamily protein	2.68628			located_in nucleus	AGCCAACTTCATTTCTCCGGTTTAAGTTCATCCTCTCTTTTTATCCAACAGCTCGGTTTA
A_84_P16839	AT5G36970	NHL25	NP237084	At.55170	NDR1/HIN1-like 25	2.81116				CGTTGATAGCTTGGCTGCTAACAGTGTGATTAGGGTTAGAAGTAGTAACTGCAAATACAG
A_84_P15895	AT5G37640	UBQ9	TC375215	At.65595	ubiquitin 9	4.23678	enables mRNA binding	acts_upstream_of_or_within ubiquitin-dependent protein catabolic process	located_in nucleolus	CCGTCTCCGCGGTGGAGAGTGCTTTGGTTTTATTTTTCTTTTCTTGTTATGTTTTAACTC
A_84_P577086	AT5G38270	AT5G38270	TC371442	At.55215	F-box family protein	2.47389			located_in nucleus	ACGTATGGCCACCATATTATTCTCCTGCTGCTACAAATTGGGGTGTCTTCGATCTTGCAA
A_84_P503082	AT3G10300	AT3G10300	TC375607	At.43629	Calcium-binding EF-hand family protein	2.05689	enables calcium ion binding	acts_upstream_of_or_within hormone-mediated signaling pathway	located_in nucleus	GTCTTGCTTCAACAATCTAGGTTTGAGTTTTTGGAATTATCTTGTTGAATTTTCCTCTGC
A_84_P13448	AT2G25890	AT2G25890	TC389538	At.38961	Oleosin-like protein	2.05613			located_in mitochondrion	AACGTGGATTTATAAGTACGTTACCGGAAAACACCCGATGGGAGCGGATAAGGTGGATTA
A_84_P825849	AT1G28260	AT1G28260	TC359603	At.43752	Telomerase activating protein Est1	2.10451				TTAGTTTCTCAGGCTGCTTTGGTGCTCTGTCTTCAAATTTCGAACACTGGTCTGAGATAT
A_84_P564068	AT1G77655	AT1G77655	TC397205	At.34432	uncharacterized protein	2.55056		acts_upstream_of_or_within cellular component assembly	located_in mitochondrion	TGGTGTGTTCCTCTTGATTTATCCGCCTTTTCAGGTTTCCAAGAAGATAGGCTTTCTTTG
A_84_P757637	AT2G14378	AT2G14378	TC393078	At.72212	egg cell-secreted-like protein (DUF1278)	2.47844				GGATGCGTATTCGAACTTTTGAAGTCAGTTTTTTCTGGTCGGTTTGGAGATGTTGGAGTT
A_84_P598194	AT3G43850	AT3G43850	TC378448	At.53706	uncharacterized protein	3.05043		acts_upstream_of_or_within defense response to bacterium	located_in nucleus	TGTTCCTAAATCTTCTTGTTGTTTGTTTCTCAACACTTCTCTGTATTTCTTGGGAAGGAC
A_84_P16771	AT5G05290	EXPA2	TC375106	At.9135	expansin A2	2.52443		acts_upstream_of_or_within plant-type cell wall loosening	located_in extracellular region	CTACGATGTTGTGCCTCATGATTGGCAGTTCGGTCAGACTTTTGAAGGCGGACAATTTTA
A_84_P17726	AT5G07510	GRP14	NP383220	At.46233	glycine-rich protein 14	2.77072	enables lipid binding	acts_upstream_of_or_within sexual reproduction	located_in extracellular region	ATGTTTTCTTTTCTCATCCTCCAAGTGTCGGAGGTTTTTCAGGTGGTTATTGCTGCCGTG
A_84_P16683	AT4G26390	AT4G26390	TC367678	At.54520	Pyruvate kinase family protein	2.20167	enables magnesium ion binding	involved_in glycolytic process	located_in cytoplasm	AGACTCTGTTGTGGCTCTCTTCCGTACAGGTAACGCTATTGTTATCAAGATCTTGACCGT
A_84_P550153	AT3G30720	QQS	TC394713	At.36724	qua-quine starch	2.55598	enables protein binding	acts_upstream_of_or_within negative regulation of starch metabolic process	located_in cytosol	AGAATTTGATGGACATTGAAAGGTTCATTTTGCCTCACACTTCTACATCAGGTGTCGCAA
A_84_P525172	AT2G33720	AT2G33720	TC371256	At.37893	AP2/B3-like transcriptional factor family protein	5.77295	enables DNA-binding transcription factor activity	acts_upstream_of_or_within response to lipid	located_in nucleus	TTGTTGTTGTCTCGGTGTTTTGGTTTCATGTGTTTTTGTTTTTTAAGTATACCGGTGTTG
A_84_P100746	AT3G28220	AT3G28220	TC369837	At.5801	TRAF-like family protein	2.96993		acts_upstream_of_or_within alpha-amino acid metabolic process	located_in chloroplast envelope	CCTATCTCCCACTTTTCCCAATTCCCTAGTTTGTAGAAATCGTTGATTCCAAGCTAGCTT
A_84_P145049	AT1G14880	PCR1	TC379923	At.70197	cadmium resistance protein 1	2.46552	enables mRNA binding	acts_upstream_of_or_within defense response to bacterium	located_in cytoplasm	TGGAGCATTATACATGTTGATAGACTTAATAACAAGTTGTGGGCGTATGTACGCGTGTTT
A_84_P764801	AT4G30064	LCR61	TC400288	At.63311	low-molecular-weight cysteine-rich 61	2.24869		acts_upstream_of_or_within defense response to bacterium	located_in extracellular region	CTTCCTTGTAATGTTTGCATTAGTTGAGCAGAATATGGGATGCATGGCAGTTCTTGGCTC
A_84_P11266	AT5G63070	AT5G63070	TC389060	At.66664	Ribosomal protein S19 family protein	2.28527	enables RNA binding	involved_in translation	located_in cytoplasm	GTTAATCACCATAGACCACGTATTTGTGGTTGTTGTTGTTTCCGTCGGTCCACCAGGTTT
A_84_P757444	AT2G25685	SCRL17	NP1658586	At.63210	SCR-like protein 17	2.15253				TAACGGACGTAGCTTATGTTTAGACACATTTTGGAAAACTCCCCCTTCTCCCGGATTATC
A_84_P761176	AT3G27503	SCRL19	TC388888	At.63251	SCR-like 19	2.23525		involved_in signal transduction	located_in extracellular region	ATTGTTTGTTTTGTTGTTGATTTGGTGAATAAGGCGAAGTTGTACGAATTGAGCCGCGTT
A_84_P19046	AT1G69920	GSTU12	TC376510	At.35363	glutathione S-transferase TAU 12	2.07963	enables glutathione transferase activity	acts_upstream_of_or_within toxin catabolic process	located_in cytoplasm	CCATGAAGCTGTAAAACCTTACATGCCTACCGTTGCCGAGTTCATCGAGTTTGCCAAAAA
A_84_P12551	AT2G29470	GSTU3	TC378250	At.12689	glutathione S-transferase tau 3	5.19062		acts_upstream_of_or_within toxin catabolic process	located_in cytoplasm	CGTGAGGGAATGCATTCCTGATAGAGAGAAACATATTGAGCACATGATGAAAATTGTAGG
A_84_P23078	AT3G21500	DXPS1	NP301758	At.27992	1-deoxy-D-xylulose 5-phosphate synthase 1	3.30824	NOT enables 1-deoxy-D-xylulose-5-phosphate synthase activity	involved_in terpenoid biosynthetic process	located_in chloroplast	AGCGTCTCACATTGCAGCCACTGCACTTAACTTAATGGGAACACCTAGAGAAGCATTGTT
A_84_P18640	AT4G16590	CSLA01	TC363637	At.4427	cellulose synthase-like A01	3.37469	enables glycosyltransferase activity	acts_upstream_of_or_within anthocyanin-containing compound metabolic process	located_in Golgi apparatus	ATGGGCACACATGGTTACATTTCTATCTTTTTCTTCAGGCCACAGCCTTTTTCGTCTCCG
A_84_P20837	AT1G09860	PUP16		At.66949	purine permease 16	2.27271	enables purine nucleobase transmembrane transporter activity	acts_upstream_of_or_within purine nucleobase transport	located_in membrane	GTCTTGGCTCTAGCTTCTTACTTCTACTCCCTGCACACAAAAAAGAAGAAGGAGATCGCA
A_84_P11446	AT1G15520	ABCG40	TC358382	At.49303	pleiotropic drug resistance 12	2.56962	enables efflux transmembrane transporter activity	involved_in abscisic acid transport	located_in mitochondrion	TTGCCGCCATGAACGTCATCTTTCCTTTGCTCTTTGCCGTTATCTTTGCTATCGGAATCA
A_84_P517047	AT1G57943	PUP17	TC371872	At.62379	purine permease 17	4.37717	enables purine nucleobase transmembrane transporter activity	acts_upstream_of_or_within purine nucleobase transport	located_in membrane	GCTTTCTCTGCTACAATTGCTTTCTCATTATCTCTTTGCTTAATCCAACTCGGGTTCGAG
A_84_P797027	AT2G22460	AT2G22460		At.68865	MIZU-KUSSEI-like protein	2.02798		involved_in hydrotropism	located_in nucleus	TTTGGTGTTCAAGTGTTATAGGGTTTATATAGGGCGACAGAGGAGGGTTTACGTACGAGT
A_84_P582538	AT1G03103	AT1G03103	TC398548	At.63144	bifunctional inhibitor/lipid-transfer protein/seed storage 2S albumin superfamily protein	2.047			located_in extracellular region	CATCTTGTCTTTCGTATCCATAGCTCTGGTCCTCGCTATAATATGAATCTCAGATCTTCT
A_84_P757328	AT2G04045	AT2G04045	TC393159	At.63220	Defensin-like (DEFL) family protein	2.71189			located_in extracellular region	TGTCTCCGGTTCTTATATGTGTTTTGATGGCCTATGTACGTGTACCAATTAATGGCACGT
A_84_P509804	AT1G21990	AT1G21990	TC368926	At.51715	F-box/RNI-like/FBD-like domains-containing protein	4.92973				CCTGCCTTTGCATCCGTAAGAAGACGAGGGGAGAATGTTGTTTATTGACATGTCAAGTGA
A_84_P13456	AT1G64130	AT1G64130	NP173674	At.52356	polyketide cyclase/dehydrase and lipid transport superfamily protein	2.22879		acts_upstream_of_or_within macromolecule biosynthetic process		TGTGGACTATATCAATGAGTTGGTTCTTCGTACTGGTGGTCAGCTCCTACGACGTCTTAA
A_84_P571865	AT3G23420	AT3G23420	NP301840	At.53459	F-box and associated interaction domain-containing protein	3.12152				TGATGTTTGATTATGTCTCCTCCACTTCTGCTGAGTTCAAAATCTACGACTTTAACTCTG
A_84_P592948	AT4G11911	AT4G11911	NP13350497	At.73507	STAY-GREEN-like protein	2.52634				TTTGGATCTCATTGCGGAACTTCGTTACTTCATATTTTGCAAGGAGTTACCCATGGTGTT
A_84_P764877	AT4G14315	AT4G14315	TC396046	At.48024	uncharacterized protein	3.3546		acts_upstream_of_or_within regulation of developmental process		TGCACCATCTCTTCCAATGATCTTGATGTTTCCGGTCGTATTGCTCTTTGTGTTTCTCTA
A_84_P12085	AT5G18880	AT5G18880	NP2705796	At.65526	RNA-directed DNA polymerase (reverse transcriptase)-related family protein	3.65448				CTCTTCTTTGAGTGCTCCTTCTCTTTGGCAATTTGGGAGTTCTTTGCTTCGAAGTTTCGG
A_84_P279890	AT5G22610	AT5G22610	NP237841	At.54951	F-box/RNI-like/FBD-like domains-containing protein	2.88933				GCCGTGTTTTCTTAGACTATTTTGATGTTGCTGAATCCTATTATGGTGCCATTGTGAGTT
A_84_P605581	AT5G25425	AT5G25425	NP2704406	At.54997	glycine-rich protein	3.96171				TGTGGTTTCGGTTGGTTAGGTTTATTACCGGCTTTGGTAGTGTTGATTTTGGTTTCATAG
A_84_P59870	AT5G33390	AT5G33390	TC379634	At.49083	glycine-rich protein	2.60602				TGTGGTACGTGTGAATGTCTCTCTTGTCTGCTTTGTTACGTGATTAGGATTAATTGAAAA
A_84_P828837	AT1G07645	DSI-1VOC	TC385462	At.59209	dessication-induced 1VOC-like protein	2.03987			located_in extracellular region	ACGGCATTGTTGTACGCATCGGAAGCCACGTTAAGTGAATTCAAAATAAAGACTCGTAAA
A_84_P537328	AT1G12805	AT1G12805	TC395426	At.48138	nucleotide binding protein	2.48759			located_in mitochondrion	TGCATGCGCAATAGTATATGCATGGGAACTTTATTAGTTGTAGCTCTCGTTTTTCTAACA
A_84_P752838	AT1G69818	AT1G69818	TC403892	At.63186	defensin-like protein	2.04589			located_in extracellular region	CTTCTTGGTTCTTTGCCTTTGTGTTCTCTCAACAGCAGAGTTTGGAGAAGCACAAATTCT
A_84_P10722	AT2G03460	AT2G03460	TC401472	At.49326	Galactose oxidase/kelch repeat superfamily protein	2.9738				GATGTGCTTACCGAACCTGTAGGATATGTTGTTTTGGAGAAGGTTCTTGATGTTACTCTT
A_84_P21104	AT2G19550	AT2G19550	TC374777	At.63477	alpha/beta-Hydrolases superfamily protein	2.30223			located_in membrane	TTTTTACTTGTTAAGGATTAAACTATTATTAGGCTTGTGGCTTCTGTTACTGGAGAGGAG
A_84_P81249	AT2G44240	AT2G44240	TC368775	At.26253	NEP-interacting protein (DUF239)	4.85335		acts_upstream_of_or_within response to oxidative stress	located_in extracellular region	GGTCCTGGTCAGAACGTTAAATGCCCGTGATCTGATCTGTGTGTTCAAGCTTTTGATATT
A_84_P762152	AT3G43572	AT3G43572	NP13349794	At.73608	uncharacterized protein	2.42248				TGTGGCATTGTGTTTTACAACTCTTGTCTCCGAGCTAGCATGGTTTTATCATCGGACTAT
	DOWNREGULATED GENES
Probe	Locus tag	Gene symbol	TIGRID	UniGenID	Gene description	FC	Molecular function	Biological process	Cellular component	Seq
A_84_P13249	AT1G03880	CRU2	TC394377	At.20	cruciferin 2	-4.9366	enables nutrient reservoir activity	nvolved_in cellular response to abscisic acid stimulus		AAGCTAAACGAGTAAAGTTTAGCACGATTGAGACCACACTGACCCATAGCAGTCCAATGA
A_84_P20419	AT1G06280	LBD2	TC383998	At.65889	LOB domain-containing protein 2	-2.94193			located_in nucleus	TGCAAGGTGGTTGGGAAAATCTAAAGCACGATCAAAGGCAACAATGTTATGCAGTGATTA
A_84_P13548	AT1G07430	HAI2	TC364217	At.28399	highly ABA-induced PP2C protein 2	-2.03736	enables myosin phosphatase activity	acts_upstream_of_or_within negative regulation of abscisic acid-activated signaling pathway	located_in chloroplast	ATAGGAGACAATTATTTAAAACCGTACGTCACTTCGGAGCCGGAAGTGACGGTTACGGAT
A_84_P788781	AT1G09080	BIP3	NP043389	At.42242	Heat shock protein 70 (Hsp 70) family protein	-2.02688	enables ATP-dependent protein folding chaperone	acts_upstream_of_or_within pollen tube growth	located_in chloroplast	TTGCTGAGGAAGATAAGATTATGAAGGAGAAGATTGATGCGAGGAACAAGCTTGAAACGT
A_84_P23682	AT1G09510	AT1G09510	NP040879	At.71269	NAD(P)-binding Rossmann-fold superfamily protein	-6.49232	enables alcohol dehydrogenase (NAD+) activity			GAGAAAGTGAAGAGTTTGGGAATTGAGTTCACTCCCACAGAAGCAACCCTTAGAGACACT
A_84_P14905	AT1G18350	MKK7		At.51662	MAP kinase kinase 7	-2.21105	enables kinase activity	acts_upstream_of_or_within auxin polar transport		AGAAAACTCCGATGTTTACGCAGGCGATATCTGGAGTTTCGGAGTGATGATACTTGAGCT
A_84_P811915	AT1G43890	RAB18	TC394422	At.20221	RAB GTPASE HOMOLOG B18	-4.37043				CTTAGCTCAAAGTGTTTGCTTAAGACAAGAAGAACATGGCGTCTTACCAGAACCGTCCAG
A_84_P753210	AT1G45223	AT1G45223	TC398727	At.65981	ECA1 gametogenesis related family protein	-2.85876			located_in extracellular region	CTGATAGACGAAGTTTAATTGGCCGTGAAGCACAATACTTGAAGAAGAGGGATGACGTGT
A_84_P14274	AT1G52690	LEA7	TC377455	At.21275	Late embryogenesis abundant protein (LEA) family protein	-3.2189		involved_in protein stabilization	located_in cytosol	AAGAACATGTTTCTTCAGCTCCAAGTACTACTACTACGACCACTACTCGTGAGACACAGA
A_84_P751191	AT1G57760	AT1G57760	TC395846	At.71349	ECA1 gametogenesis related family protein	-3.22877			located_in extracellular region	CGTGAAACACAATACTTGAAGAAGAGGGATGACGTGTGGAGTCATTGTGTGTCAATCTCT
A_84_P549850	AT1G60190	PUB19	TC362427	At.66059	ARM repeat superfamily protein	-3.66727	enables ubiquitin-protein transferase activity	acts_upstream_of_or_within regulation of seed germination	located_in chloroplast	CAACGCGTTAATCGCGATTCGGAGTTTGTTAATGAACCAACCTGATAATCACTGGCGGAT
A_84_P820317	AT1G68250	AT1G68250		At.47620	uncharacterized protein	-5.51698				GGAAACAAGAGCGGGAAAGAGGGTTATCGACTCAAACTTCTGTCGGAACTTGATCATATT
A_84_P17108	AT1G71000	AT1G71000	TC391158	At.52471	Chaperone DnaJ-domain superfamily protein	-2.25127		acts_upstream_of_or_within defense response to fungus	located_in cytoplasm	ACTTGAACCAAACGCCTGATTGGCATTCACAGATGTCTCTACCGCTTTCAAGCTTTGAGT
A_84_P506433	AT1G72980	LBD7	TC383003	At.66132	LOB domain-containing protein 7	-2.01349			located_in nucleus	TGGAGATGCCTGAACAAACCAGCAAAGTAAAGCTTGAGGAGGAAAAAATCTCTGACCAGA
A_84_P830704	AT1G80260	emb1427	TC358947	At.33948	Spc97 / Spc98 family of spindle pole body (SBP) component	-2.03914	enables gamma-tubulin binding	acts_upstream_of_or_within embryo development ending in seed dormancy	located_in microtubule organizing center	GTGCTATGGGAATCAAAATTAACAGTCGCAGAAGCCAGTAATAATGGAGTCGTTGCTTCG
A_84_P800627	AT2G02700	AT2G02700		At.71337	cysteine/histidine-rich C1 domain-containing protein	-3.35227			located_in nucleus	ATATGAGACATGGTTTCCCATCGATTTCTCCTTTTTGAAATTCTCCGACCACGTCCATGT
A_84_P794784	AT2G03090	EXPA15		At.67706	expansin A15	-2.52739		acts_upstream_of_or_within plant-type cell wall loosening	located_in extracellular region	AGTGATAAAACAAAGGAACCCATTGGTGAAACATAGAGGTCCCTTAACACACACCACTCT
A_84_P20161	AT2G15010	AT2G15010	TC384208	At.27089	Plant thionin	-4.13945		acts_upstream_of_or_within defense response	located_in extracellular region	ACCAAGGCATGTTCTACTATATGCACTAAAGGATCTAAAACCGCAGTTGAAACTGTGTAA
A_84_P21041	AT2G18340	AT2G18340	TC367091	At.66353	late embryogenesis abundant domain-containing protein	-2.28316		involved_in response to water deprivation	located_in endoplasmic reticulum	GAAACCGCAAAGAAAAAGGCTTCTCAAGTTGCGGGAGAAATAAGAGACCGTTATGCTGAG
A_84_P19231	AT2G26150	HSFA2	TC369009	At.38933	heat stress transcription factor A2	-2.07189	enables DNA-binding transcription factor activity	acts_upstream_of_or_within cellular response to hypoxia	located_in nucleus	ATTGGGACAGCCAAGATCTACATGACATGGTTGATCAAATGGGTTTTCTTGGTTCGGAAC
A_84_P540231	AT2G28090	AT2G28090	TC383541	At.49359	Heavy metal transport/detoxification superfamily protein	-2.07311			located_in nucleus	CAAAGAGAAGGAAACGGTAACAGTCATGGGAACAATGGACATCAAGTCTGTGACAGATAA
A_84_P196294	AT2G28860	CYP710A4		At.49559	cytochrome P450 710A4	-3.07781	enables C-22 sterol desaturase activity	involved_in sterol biosynthetic process	located_in extracellular region	AAGTCAAGAAAACGATTTGTGATGATTACAGTTTGTTAACTCTTGGAACAATGGCGATCC
A_84_P22954	AT2G29380	HAI3	TC370492	At.50109	highly ABA-induced PP2C protein 3	-2.37366	enables myosin phosphatase activity		located_in nucleus	AGGTAACCATAACGGACAGGAGAGACGATGACTGCCTCATACTAGCTAGTGATGGTTTAT
A_84_P15435	AT2G34370	AT2G34370	TC368771	At.53032	Pentatricopeptide repeat (PPR) superfamily protein	-2.59706	enables zinc ion binding		located_in mitochondrion	TATTGATGGCCACAACACATTTAAGATGATCTCACTGATCACCGGCAGAGCACTGATACA
A_84_P12492	AT2G42000	AtMT4a	TC392472	At.42759	plant EC metallothionein family protein	-3.41835	enables zinc ion binding	acts_upstream_of_or_within zinc ion transport	located_in cytoplasm	TTAAGATTGAAAACGAAAATGGCAGATACAGGCAAAGGAAGCTCTGTCGCTGGCTGCAAC
A_84_P22906	AT2G42560	AT2G42560	TC361822	At.36994	late embryogenesis abundant domain-containing protein	-4.10896		acts_upstream_of_or_within cold acclimation	located_in cytosol	ACACATGAGCATGGAACTACTGATCCTGACTATATGAGACGGGAACATGGACAACGTTGA
A_84_P109472	AT2G47770	TSPO	TC388558	At.23206	outer membrane tryptophan-rich sensory protein-like protein	-2.18251	enables heme binding	acts_upstream_of_or_within response to abscisic acid	located_in Golgi apparatus	AAACGCTATACGATGATGTTTGTAGAGTCTGAGTCATATGAGTGTTTCTTGTTGTTTTTG
A_84_P761601	AT3G01326	AT3G01326	NP1656346	At.65054	ECA1 gametogenesis related family protein	-2.56455				GTAAACGTGAGTGGATGTTTCGATGCGTTGAAATTAGCGTTAGGGTCGGAGAAATTTGTC
A_84_P18335	AT3G02480	AT3G02480	TC390677	At.18809	Late embryogenesis abundant protein (LEA) family protein	-2.8956		acts_upstream_of_or_within negative regulation of leaf senescence	located_in cytosol	ATGGACAACAAGCAAAACGCGAGCTACCAAGCCGGTCAAGCCACTGGCCAGACTAAGGAG
A_84_P186914	AT3G11480	BSMT1	TC385509	At.39742	S-adenosyl-L-methionine-dependent methyltransferases superfamily protein	-3.3694	enables S-adenosyl-L-methionine:benzoic acid carboxyl methyl transferase activity	acts_upstream_of_or_within defense response	located_in nucleus	ATGTGACTCAACATGCCAACTGCAGGAACAAAACGACTGTCAGTCTTGTCGTTTCCTTGA
A_84_P14587	AT3G14440	NCED3	TC361201	At.26346	9-cis-epoxycarotenoid dioxygenase 3	-2.05138	enables 9-cis-epoxycarotenoid dioxygenase activity	acts_upstream_of_or_within abscisic acid biosynthetic process	located_in chloroplast	CAGATAGTTAACGCCGTTAGCTTAGAGGTTGAAGCAACGGTTAAACTTCCGTCAAGGGTT
A_84_P187174	AT3G17520	AT3G17520	TC373582	At.52	late embryogenesis abundant protein (LEA) family protein	-2.37815		acts_upstream_of_or_within acquisition of seed longevity	located_in endoplasmic reticulum	AGAAGTTGGGAGAAACTCATCGATGACTTGAACAGTGTTAAGATGTTGATCTTGCTTTTC
A_84_P21216	AT3G20160	AT3G20160	TC374255	At.53400	Terpenoid synthases superfamily protein	-2.47222	enables dimethylallyltranstransferase activity	involved_in farnesyl diphosphate biosynthetic process	located_in chloroplast	GGAGTGGAGAAATCGAAAGAATATGCTGAGAGATTGAACATAGAAGCGCGGGAACATCTT
A_84_P22124	AT3G22640	PAP85	TC365887	At.21535	cupin family protein	-2.66818		involved_in response to virus	located_in extracellular region	GAGTCGTAGCCAACAACAAATTCCAGAGAAACACAAGCCATCGTTTCAATCAATCTTAGA
A_84_P832899	AT3G25810	AT3G25810	TC384355	At.37322	Terpenoid cyclases/Protein prenyltransferases superfamily protein	-2.57201	enables (4S)-limonene synthase activity	acts_upstream_of_or_within monoterpene biosynthetic process	located_in chloroplast	GTTGAAGAAAAAGGTGAAGAAGATGCTAGAGGAAGTAGAGACGAAGAGCCGTCTCGAGAA
A_84_P547483	AT3G27025	AT3G27025	TC393780	At.50228	uncharacterized protein	-2.09054		involved_in regulation of auxin polar transport	located_in chloroplast	ATCTCCGAAGCGAACAGGAAACGAGAAAACTGGATCAAGACCGACACAGAGTATCTTGTT
A_84_P20323	AT3G49620	DIN11	TC382103	At.35583	2-oxoglutarate (2OG) and Fe(II)-dependent oxygenase superfamily protein	-2.11251		acts_upstream_of_or_within cellular response to starvation	located_in cytoplasm	TGCCAAAAGAGTCGTCTATGGACAGCATCTGATTAACAAAGTCCTGACAACCTTTGCAAA
A_84_P820015	AT3G54490	RPB5E	TC376592	At.71274	RNA polymerase II fifth largest subunit, E	-2.95407	enables DNA binding	involved_in DNA-templated transcription	located_in nucleus	ATTTTAAACAAAGAGGAGAAAGAACAACTGCTGAGGAAGCATGCACTTGAGGACAAACAG
A_84_P15632	AT3G58390	AT3G58390	TC371958	At.65292	Eukaryotic release factor 1 (eRF1) family protein	-3.82558	enables protein binding	acts_upstream_of_or_within nuclear-transcribed mRNA catabolic process	located_in nucleus	TTCGTCAATGCATGCTTCAGGGGAACAACTAGCACAGCATACTGGAATTGCAGCTATTCT
A_84_P547576	AT4G03480	AT4G03480	TC363884	At.54116	Ankyrin repeat family protein	-3.20846		acts_upstream_of_or_within defense response to bacterium	located_in chloroplast	CACTAAGAAGCAGATCAGAGCCTCTAGACGCTAAAAAATACAAAGACCATATCAACGCTC
A_84_P10012	AT4G09600	GASA3	TC385090	At.24572	GAST1 protein homolog 3	-3.14448		acts_upstream_of_or_within response to gibberellin	located_in extracellular region	TTCTGCCTCACCACTTTTGAGCTTCATGTTCATGCTGCTGAAGATTCACAAGTCGGTGAA
A_84_P15686	AT4G10250	ATHSP22.0	TC375566	At.246	HSP20-like chaperones superfamily protein	-2.51147		acts_upstream_of_or_within cellular response to hypoxia	located_in chloroplast	GTTAACATTGCAGCTGAAGAAGACCAAACTGCAAAAATCAGCTCTTCTGAATCCAAAGAA
A_84_P23308	AT4G27140	SESA1	TC381258	At.158	seed storage albumin 1	-13.9189		acts_upstream_of_or_within defense response	located_in extracellular region	TTTCAGAAAGAACAACACCTAAGAGCTTGCCAGCAATTGATGCTCCAGCAAGCAAGGCAA
A_84_P299220	AT4G27150	SESA2	TC380685	At.43652	seed storage albumin 2	-8.55271			located_in extracellular region	ATGAGTTCGATTTGGAAGACGACATCGAGAACCCACAAGGCCCCCAGCAGGGACACCAGA
A_84_P68434	AT4G27160	SESA3	TC381521	At.19908	seed storage albumin 3	-3.28934	enables protein histidine kinase binding	acts_upstream_of_or_within seed maturation	located_in extracellular region	TTACTACTAGAGTCCAAGCCCGGCCTAGCACGATGATCATGAGTGTTGCTATTGATGTAT
A_84_P11966	AT4G28520	CRU3	TC364552	At.21702	cruciferin 3	-11.5751	enables nutrient reservoir activity	involved_in cellular response to abscisic acid stimulus	located_in protein body	ATTGCCATTGGAGGTCATATCAAATGGTTTCCAGATCTCTCCCGAGGAAGCTAGGAAGAT
A_84_P765048	AT4G33467	AT4G33467	TC399217	At.64715	uncharacterized protein	-5.00967		acts_upstream_of_or_within response to abscisic acid	located_in nucleus	AAGACGAAAGAATGATGTTTATGAGTCCTCATGCTTGGGACATTCATACCGCTCCTTTCT
A_84_P592130	AT4G33905	AT4G33905	TC373979	At.2396	Peroxisomal membrane 22 kDa	-2.11411		acts_upstream_of_or_within response to abscisic acid	located_in mitochondrion	TCCAGATTTTAGGAGGATATAATGTAAGGAGTTTTGGGGAAAACTGTGCATTTGGACATG
A_84_P17676	AT4G37990	ELI3-2	TC368868	At.41	cinnamyl alcohol dehydrogenase 8	-2.14645	enables aryl-alcohol dehydrogenase (NADP+) activity	involved_in lignin biosynthetic process	located_in cytoplasm	TATGATAGGAGGGATAAAAGAGACCCAGGAAATGATAGATATGGCCGGGAAACACAACAT
A_84_P191974	AT5G03210	DIP2	TC386912	At.20355	E3 ubiquitin-protein ligase	-2.35801		acts_upstream_of_or_within defense response to virus	located_in nucleus	GACGATTTTAGAAGGCGGAGAGACCGAAGAAGACAATCAAGAACAAGAAAACGAGGACGT
A_84_P855492	AT5G04120	AT5G04120	TC381665	At.33173	Phosphoglycerate mutase family protein	-2.43642	enables L-phosphoserine phosphatase activity	acts_upstream_of_or_within D-serine biosynthetic process	located_in cytoplasm	GAAAGACCTGTAGCTGTGTATTCATCAGACCTCAAACGAGCCAAAGACACTGCTCTTATG
A_84_P21718	AT5G04380	AT5G04380	NP2706523	At.54717	S-adenosyl-L-methionine-dependent methyltransferases superfamily protein	-6.0323			located_in nucleus	ATCATGTGTCTCAGCATGCTAGCTGCAGGGTAAAAACGAGTGTAACTCTAATAGTTTCAC
A_84_P786477	AT5G05220	AT5G05220	TC386426	At.26487	uncharacterized protein	-6.45587		acts_upstream_of_or_within abscisic acid-activated signaling pathway	located_in chloroplast	TGGGGGCTGATGATGGGAAGGACCCTAAAGATTATAACAGAAGAGCAAAGATTTTTGACA
A_84_P16776	AT5G06760	LEA4-5	TC378445	At.48991	late embryogenesis abundant protein 4-5	-4.40629	enables osmosensor activity	acts_upstream_of_or_within response to osmotic stress	located_in cytosol	ACACAGGTTAAAGAAGATAAGATCAATCAAGCTGAGATGCAGAAGAGAGAAACGCGTCAG
A_84_P10161	AT5G07260	AT5G07260	NP213728	At.23335	START (StAR-related lipid-transfer) lipid-binding domain-containing protein	-2.07892	enables lipid binding	acts_upstream_of_or_within somatic embryogenesis	located_in nucleus	GGAGAACATGGTCACTAACATTCTAGGAAATGTCCAAAATGCTCTTCCAGTCCACCGTTG
A_84_P11148	AT5G24080	AT5G24080	TC367335	At.26352	Protein kinase superfamily protein	-2.02311	enables protein serine/threonine kinase activity	acts_upstream_of_or_within response to abscisic acid	located_in extracellular region	CTCAGAGTTATCGTTCCTCCTCTCGGTCTCATGCTACTTGTAGTTATTCTTCAATGTCTC
A_84_P769464	AT5G27260	AT5G27260	TC376275	At.55033	Myb/SANT-like DNA-binding domain protein	-2.12267			located_in nucleus	CAAAATTTATCATTTGGGAATACAAGACGTTTTCGTGAGCATGTCGGTGGAAGAGAGGCT
A_84_P766281	AT5G34905	AT5G34905	TC381011	At.55126	ECA1 gametogenesis family protein	-2.46898			located_in chloroplast	AATGGAACAATGCCTGATCCTTGTTGCAACGATCTCGTTAAAGAAGGAAAAGTGTGTCAC
A_84_P852477	AT5G35660	AT5G35660	TC394670	At.74628	glycine-rich protein	-2.60212				CCGATGCATTAAGCCACCTTACGTAGCCTAGCTCAAAGCCTTAACTGTCATGTAAGTTAT
A_84_P602046	AT5G40790	AT5G40790	TC377431	At.65610	uncharacterized protein	-2.85937		acts_upstream_of_or_within negative regulation of DNA-templated transcription initiation	located_in nucleus	AAAGAGCTTGTATAATTCGATCATAGGGCTATCGTCATCTTTTGATCGGAAGGTGGTGGA
A_84_P768137	AT5G42797	LCR28	NP1657019	At.71984	low-molecular-weight cysteine-rich 28	-2.56879				TAAAAGAGTAGGAGTTCAAGGATTGTGTGTACCACCTGGATTCGATCCAATAGATCAGGC
A_84_P311113	AT5G43840	HSFA6A	TC377671	At.55345	heat stress transcription factor A6A	-2.06281	enables DNA-binding transcription factor activity	acts_upstream_of_or_within regulation of DNA-templated transcription	located_in nucleus	AATTTGGAAGGGTTTCGTGTTGAGTGAGGAGGAGATGTGTGATTTAGTGGAACATTTTAT
A_84_P503480	AT5G45630	AT5G45630	TC387671	At.30002	senescence regulator	-2.5259		acts_upstream_of_or_within response to abscisic acid	located_in cytoplasm	TGACCGGTTCTGTTGGAAGTTTTTATTTATTTTATCAACTGTTTGGGAGTTTTCTTTCGC
A_84_P145159	AT5G50360	AT5G50360	TC372460	At.6854	von willebrand factor A domain protein	-3.65311		acts_upstream_of_or_within negative regulation of DNA-templated transcription initiation	located_in nucleus	GTGAGGATTGGGCCGTTGGATTAGAGATGATGTTAGATTGATGAGATGAGGATATTTAAT
A_84_P80329	AT5G50600	HSD1	TC369910	At.7139	hydroxysteroid dehydrogenase 1	-3.59306	enables 11-beta-hydroxysteroid dehydrogenase (NADP+) activity	acts_upstream_of_or_within response to abscisic acid	located_in chloroplast	CGGATTAGAGAGGGGTCAATACATAATAAATGGATGAGATGTATCATGAGTATGTGCAAT
A_84_P21625	AT5G52300	LTI65	NP044237	At.43012	CAP160 protein	-2.78296		acts_upstream_of_or_within response to abscisic acid	located_in cytoplasm	TTATCGGAAATGATAGCTGAGAAACTTCATTTTGGAGGAGGAGGAGAGAAGAAGACAACG
A_84_P841862	AT5G53710	AT5G53710	NP230452	At.64293	uncharacterized protein	-2.04194		acts_upstream_of_or_within response to abscisic acid	located_in mitochondrion	AGCTGGCTTTTGTGAATCAGAGAACCTCTCTCAGTTGTTTTGACGAGAGTAAATGGATCC
A_84_P523908	AT5G53905	AT5G53905	NP2704268	At.48117	prolamin-like protein	-2.34528		acts_upstream_of_or_within macromolecule biosynthetic process	located_in nucleus	TATATGAAACGCATACATGGGTACTGGGCATGGGTATTAGTGAATATATGGACGATAGCC
A_84_P20687	AT5G54740	SESA5	TC379733	At.28623	seed storage albumin 5	-59.6721		acts_upstream_of_or_within pollen development	located_in extracellular region	ATGCATGGACAGCAACAGGTGCAACATGTGTTTCAGACTGCTAAGAACTTGCCTAACGTT
A_84_P23570	AT5G65800	ACS5	TC363708	At.1918	1-aminocyclopropane-1-carboxylate synthase 5	-2.29924	enables 1-aminocyclopropane-1-carboxylate synthase activity	acts_upstream_of_or_within ethylene biosynthetic process	located_in cytoplasm	CACAGACTGTGGACGAATGATATCAAGAAGCAGCCATGAAAGGCTCAAGAGTTTGAGGAA
